1  
2  
3  
4  
5  
6  
7  
8  
9  
10  
11  
12  
13  
14  
15  
16  
17  
18  
19  
20  
21  
22  
23  
24  
25  
26  
27  
28  
29  
30  
31  
32  
33  
34  
35  
36  
37  
38  
39  
40  
41  
42  
43  
44  
45  
46  
47  
48  
49

**Variation in protein coding genes identifies information flow as a contributor to animal complexity**

Jack Dean, Daniela Lopes Cardoso and Colin Sharpe\*

Institute of Biological and Biomedical Sciences  
School of Biological Science  
University of Portsmouth,  
Portsmouth, UK  
PO16 7YH

\* Author for correspondence  
colin.sharpe@port.ac.uk

Orcid numbers:  
DLC: 0000-0003-2683-1745  
CS: 0000-0002-5022-0840

**Abstract**

1 Across the metazoans there is a trend towards greater organismal complexity. How  
2 complexity is generated, however, is uncertain. Since *C.elegans* and humans have  
3 approximately the same number of genes, the explanation will depend on how genes are  
4 used, rather than their absolute number. Functional diversity is a measure that quantifies  
5 the isoforms, domains and paralogues of a gene. In this paper we determine functional  
6 diversity for each protein-coding gene in the human genome and its orthologues across  
7 eight commonly used model organisms. From this we derive the Comp<sub>x</sub> list of genes that  
8 correlate positively with their increase in cell-type number. We then select genes common  
9 to the Comp<sub>x</sub> list and the ExAC list, whose genes show minimal variation across many  
10 human genomes, and identify genes with common functions, notably in chromatin structure,  
11 RNA splicing, vesicular transport and ubiquitin-mediated protein degradation. Together  
12 these functions reveal that information flow within the cell relates to cell-type number, used  
13 as a measure of organismal complexity.

14

15

16

17 Key words: Organismal complexity; information flow; chromatin; splicing; vesicular transport;  
18 ubiquitin-mediated protein degradation

19

20

21

## 1 Introduction

2 Some animals are more complex than others. For example, the nematode worm, *C.*  
3 *elegans*, widely used as a model organism, has many fewer cell types than vertebrate  
4 models, such as the mouse. Consequently, cell-type number has been widely applied as a  
5 quantitative measure of complexity<sup>1 2</sup>. Since the number of genes in the genome does not  
6 correlate with complexity<sup>3</sup>, it is more likely that patterns of gene expression and the nature of  
7 the encoded proteins are important determinants.

8

9 Patterns of gene expression are determined by cis-acting regulatory elements<sup>4 5</sup>. Since  
10 these frequently act independently, the loss or gain of an element will have little effect on the  
11 expression pattern of the gene mediated by other elements. Cis-acting regulatory elements  
12 can therefore confer the capacity for adaptive evolution as documented by the different  
13 spatial patterns of the *Pitx1* expression in sticklebacks that cause a variation in body armour,  
14 dependent on the environment<sup>6</sup> and their role in the loss of powered flight in some birds<sup>7</sup>.  
15 Although the Encode project<sup>8</sup> has mapped many cis-acting regulatory elements within the  
16 human genome, comprehensive data is lacking for most other species. Instead, in this  
17 paper we focus on a set of factors that influence protein function, to analyse how changes to  
18 these factors in orthologues relate to the complexity of multicellular animals.

19

20 Several of these factors have been shown to correlate positively with the increase in cell-  
21 type number (CTN) across the metazoan phylogeny. For example, *C. elegans* produces on  
22 average just over 1 transcript type per gene (protein coding and non-coding), whilst in  
23 humans this rises to around 5 (based on Ensembl<sup>9</sup> assembly statistics) through the wider  
24 application of alternative splicing and the use of multiple transcript start sites. The resulting  
25 transcript diversity has been positively correlated with animal complexity<sup>2</sup>. In addition, the  
26 complement of protein domains and motifs within a protein across a range of species has  
27 been shown to correlate with complexity, again as measured by CTN<sup>1 10</sup>. Although the  
28 overall number of genes is unlikely to contribute, variation in the number of related genes,  
29 the paralogues within a species, could also be important<sup>11</sup>. When a gene is duplicated the  
30 resulting daughter genes have the opportunity either to take on new activities  
31 (neofunctionalization)<sup>12</sup> or to divide the activities between the two new genes  
32 (subfunctionalisation)<sup>13</sup>.

33

34 Combining data on the number of paralogs, transcript isoforms and protein domains  
35 associated with a gene defines a value termed the functional diversity ( $D_F$ ) of the gene<sup>14</sup>.

36 Correlating  $D_F$  with cell-type number across a range of metazoans for over 2000 genes

1 associated with transcription identified genes involved in chromatin dynamics as candidate  
2 contributors to animal complexity<sup>14</sup>.

3

4 This paper determines the functional diversity for each annotated gene in the human  
5 genome and then across an additional eight species commonly used as model organisms  
6 for biomedical research ([Supplementary Data 1](#)). This approach extends previous analysis  
7 to the complete human gene list and its orthologues generating data for more than 120 000  
8 genes to identify a list of genes, the CompX list, whose function may underpin complexity.  
9 We then identify a prominent overlap between the CompX list and the ExAC list of human  
10 genes that show reduced levels of variation within the human population<sup>15</sup>. It is thought that  
11 the ExAC genes are under purifying selection because they encode proteins that play  
12 important roles within the cell. Analysis of the overlapping genes found in both lists indicates  
13 that many encode proteins that determine information flow within the organism, relating  
14 increases in cell-type number to the ability to process information. This defines a wide,  
15 systems-based context in which to evaluate the contribution of specific genes and cellular  
16 processes to animal complexity.

17

## 18 **Methods**

### 19 *Data-mining and calculation of functional diversity*

20 For each human gene, information on the number of paralogues was obtained from the  
21 Ensembl database<sup>9</sup>. Similarly, the number of protein coding transcripts and the number of  
22 protein domains encoded by each gene, as defined by the Ensembl Prosite Profiles<sup>16</sup>, was  
23 extracted from the Ensembl database using Biomart and adapted protocols  
24 (<https://github.com/JackDean1/OrganismComplexity>). The pipeline was then used to extract  
25 the same information for orthologues of the human genes across eight additional species  
26 from the nematode worm, *C. elegans* to the Macaque, *Macaca mulatta*. Since not all human  
27 genes have orthologues across all the species, the dataset covers 19 908 identifiable human  
28 genes (97.5% of the Ensembl human gene list, unmapped genes were excluded) and 127  
29 355 genes in total. Details of the genomes analysed are provided in [Supplementary Data 1](#).

30

31 A value for the functional diversity ( $D_F$ ) of each gene was then calculated. The protocol is  
32 essentially as described<sup>14</sup> and is calculated from:

33

$$D_F = \log_2 P + \log_2 I + \sum_{I=1}^{I=n} \log_2 M$$

1 Where P is the number of paralogues, I the number of isoforms and M the number of protein  
2 motifs and domains associated with the gene. The complete dataset and calculation of  $D_F$  is  
3 in [Supplementary Data 2](#).

4

#### 5 *Correlation analysis*

6 Ortho-sets, which are named after the human gene, were selected that contained the human  
7 gene and either eight, seven or six orthologues allowing for the absence, or lack of  
8 annotation, of some genes in some species. The  $D_F$  values for each gene within the ortho-  
9 set were correlated with cell type number (CTN)<sup>1 2 17</sup>, taken as a measure of the complexity  
10 of an organism, using a Pearson's correlation (r) that takes account of the degrees of  
11 freedom defined by the number of orthologues in each ortho-set. A similar approach was  
12 taken to identify ortho-sets that showed only minimal change in the value of  $D_F$  for each  
13 gene of the ortho-set. Lists of ortho-sets from the 'complexity' analysis and the 'minimal  
14 change' analysis were compiled with increasing statistical probability in a two-tailed t-test for  
15 the Pearson's correlation and the overlap between the lists determined. At  $p < 0.05$  there was  
16 a 10% overlap in the ortho-sets between the two lists, but this reduced to a 0.2% overlap at  
17  $p < 0.01$ . Consequently, the complexity ortho-set list at  $p < 0.01$ , called the CompX list, was  
18 used in all analyses.

#### 19 *GO-term and STRING analysis of the gene lists*

20 The CompX list of 571 genes ([Supplementary Data 3](#)) was subject to a Gene Ontology (GO)  
21 -term over-representation analysis using Amigo2 v2.5.12<sup>18</sup> and the Panther Classification  
22 system v14<sup>19 20</sup> to identify terms enriched by more than 2.5 fold and with an adjusted  
23 probability of less than 0.05 (Fisher's Exact test with Bonferroni correction for multiple  
24 testing). Redundancy between terms within and across the three major GO-terms was  
25 identified on a Circos plot (gene lists in [Supplementary Data 4](#)). Interactions between the  
26 571 CompX genes were identified using the STRING application<sup>21</sup>.

27

#### 28 *Validation of the CompX – ExAC list overlap*

29 A bootstrap approach was taken to determine whether the overlap between the CompX and  
30 ExAC gene lists was greater than might be expected at random. Using simply the numbers  
31 of genes in each list (571 for CompX, 3230 for ExAC and 19 908 for the human genome) the  
32 overlap between 571 random numbers between 1 and 19 908 and 3 230 random numbers  
33 between 1 and 19 908 was determined across 1000 iterations and the mean and standard  
34 deviation calculated. The process was then repeated replacing 571 with 362, the number of

1 genes in the 'no change' analysis. These calculated, expected values were then related to  
2 the actual overlaps between the gene lists.

3

4 Keywords associated with the function of each of the 159 CompX-ExAC overlap genes were  
5 extracted from GeneCards<sup>22</sup> and validated by reference to published information. The gene  
6 list was then compiled by major function ([Supplementary Data 7](#)).

7

## 8 **Results**

9 *Creating a database of functional diversity for human protein coding genes and their*  
10 *orthologues in eight metazoan species.*

11 This analysis is based on the premise that changes to the biological activity of proteins will  
12 be one of a number of factors that contributes to organismal complexity<sup>1 11 14 23</sup>. When  
13 comparing orthologous genes, the range of biological activity will depend on three factors;  
14 the number of different protein-coding transcripts that can be generated from each gene, the  
15 types and numbers of each domain that are encoded in the protein and the number of  
16 paralogues present in the genome<sup>14</sup>. Values for each of these factors were extracted from  
17 Ensembl, using Biomart, to produce a database for 19 908 human protein coding genes and  
18 127 355 protein coding genes across the nine species considered ([Supplementary Data 2](#))  
19 representing a comprehensive coverage of genes from many of the model organisms used  
20 in biomedical research. The values were then used to calculate the functional diversity ( $D_F$ )  
21 of each gene in each species, providing a metric for the capacity of that gene to provide the  
22 diverse biological activities that determine complexity. As described in the Methods section,  
23 correlating the change in value of  $D_F$  with the change in value of the cell type number, taken  
24 as a measure of organismal complexity, identified a list of 571 ortho-sets that forms the  
25 CompX list

26

27 *GO-term over-representation analysis identifies a limited number of activities*

28 Whilst it is possible that any one of the 571 ortho-sets may contribute to animal complexity,  
29 to identify CompX those with common features, we compared the CompX and human gene  
30 lists to identify GO-terms over-represented in the CompX list. The Panther Classification  
31 system<sup>19 20</sup> was used to identify GO-terms that are over-represented more than 2.5 fold and  
32 with an adjusted p-value of less than 0.05. After the resolution of redundant, nested terms,  
33 seven GO-terms met these criteria (Fig. 1 and [Supplementary Data 4](#)). These included two  
34 associated with the processing of alcohol, two involving mRNA

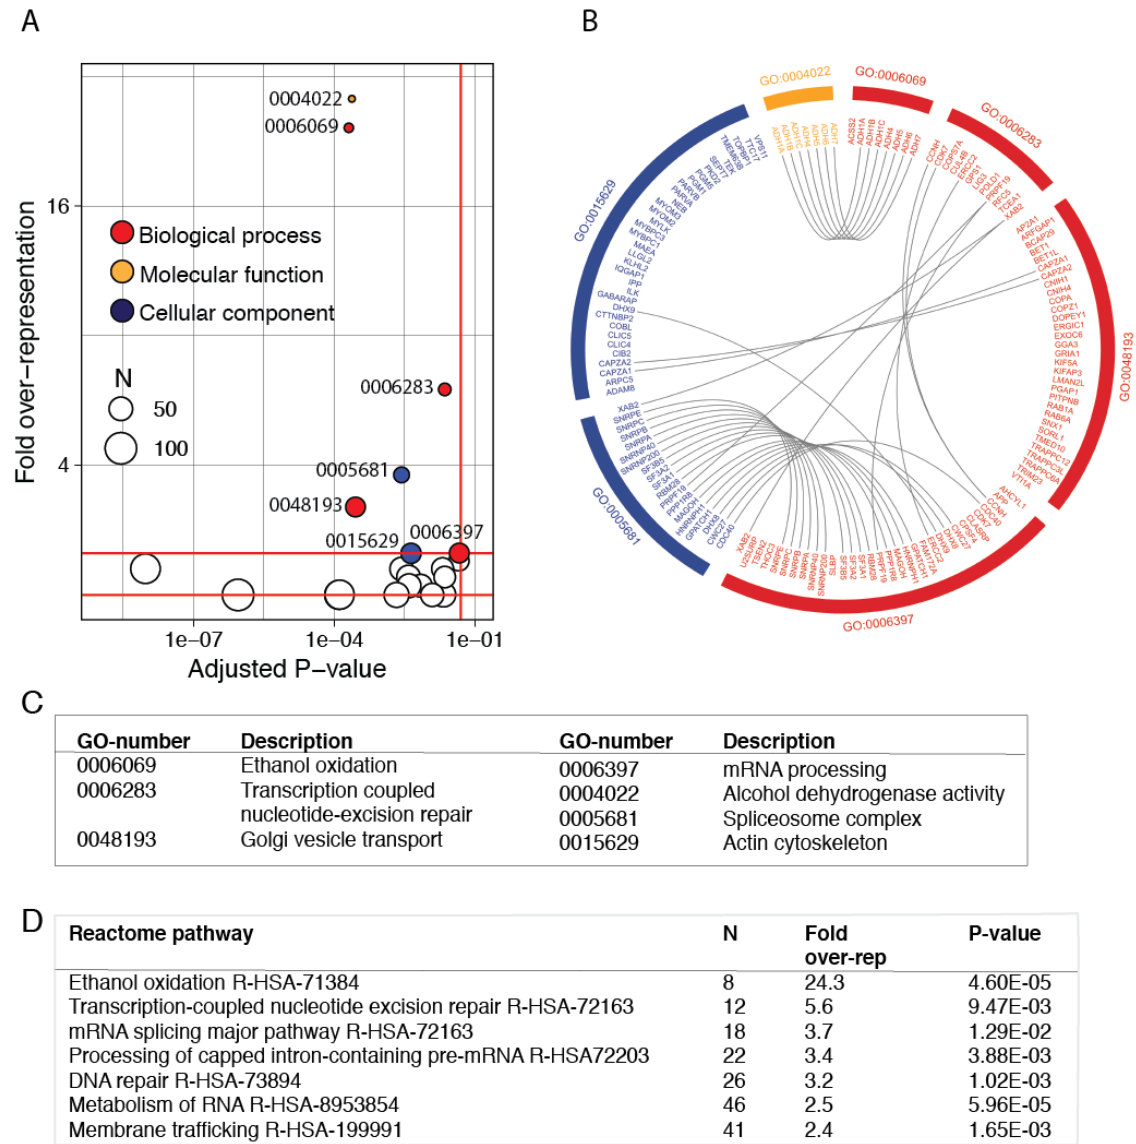

Figure 1. Over-representation assay for the 571 CompX list.

A. Combined graph for the three primary GO-term fields. 2-fold and 2.5-fold over-representation levels are shown and terms that meet the required criteria are coloured according to the primary GO-term. Terms with  $>2 < 2.5$ -fold over-representation are shown as open circles and are listed in [Supplementary Data 4](#). B. Circos plot showing redundant ortho-sets between the GO terms. Complete lists of ortho-sets are in [Supplementary Data 4](#). C. Identification of the major GO-terms. D. Identification of the major terms within the Panther Reactome for over-represented genes within the CompX list.

processing, including the spliceosome complex, and one each for transcription-coupled nucleotide excision repair, Golgi vesicle transport and the actin cytoskeleton. To further analyse the over-represented genes, the degeneracy between the ortho-sets both within and

1 across the three primary GO-terms was determined (Fig. 1B, C) to identify a definitive list of  
2 109 ortho-sets (Supplementary Data 4). Combined with a Panther over-representation test  
3 for the reactome (Fig. 1D) this identified four main activities: ethanol oxidation, the regulation  
4 of splicing, DNA repair and membrane trafficking, specifically of ER-Golgi vesicles.

5

### 6 *Identifying interacting subsets using STRING analysis*

7 Identifying interactions between proteins encoded by the CompX list will point to additional  
8 functions to which these genes contribute. The bioinformatic STRING program<sup>21</sup>, set to  
9 identify high confidence, experimentally determined interactions identified 7 activities across  
10 4 networks. (Fig. 2).

11

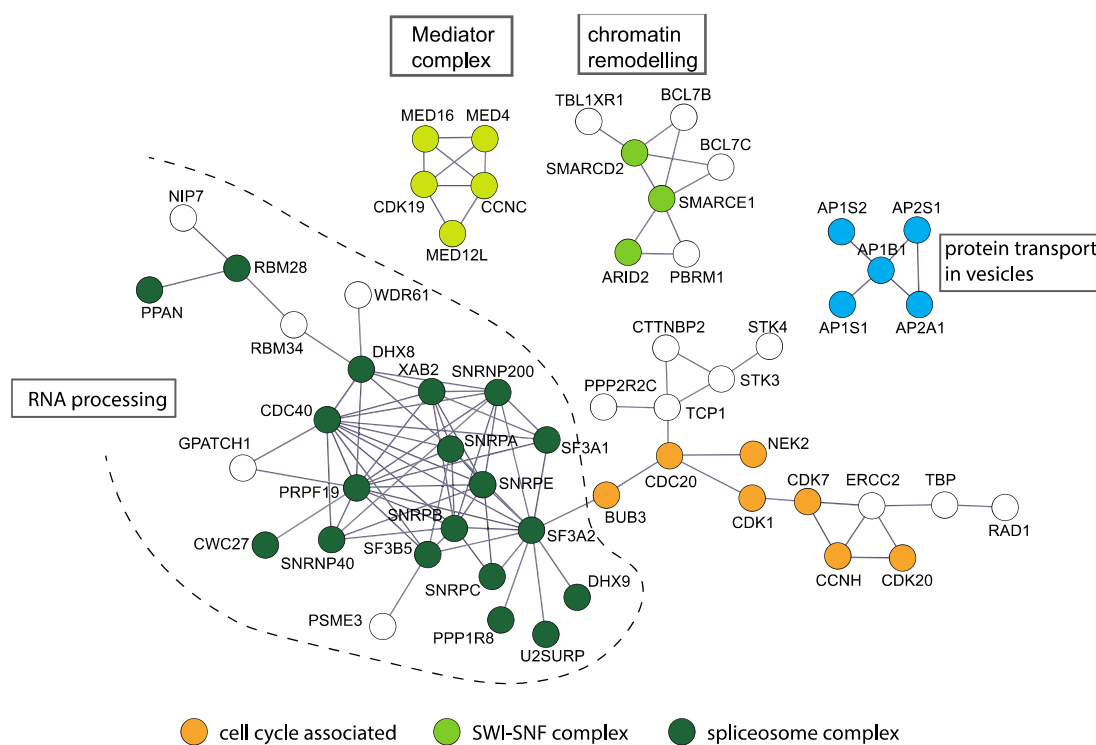

13

14

15 **Figure 2: Interaction analysis of the CompX ortho-set**

16 Only experimentally verified (confidence level 0.7) interactions and those networks containing at  
17 least one node with three connections are shown. Networks have been coloured by function. The  
18 distance between genes and the orientation is random. The analysis identified 7 major functions  
19 across 4 networks.

20

21 Conserved activities between the two approaches include RNA splicing (the regulation of  
22 splicing and snRNP complex) and protein-vesicle transport (associated mainly with the ER-  
Golgi). In addition, the interactions analysis identified members of the SWI/SNF chromatin



1 remodelling complex, proteins that impose repressive chromatin conformations, the Mediator  
2 complex and proteins that contribute to the cell cycle.

3

4 *Filtering the CompX list to identify genes with a critical function*

5 The ExAC genes are identified as the human genes that, following sequencing of over 60  
6 000 genomes, show less than expected variation<sup>15</sup>. The suggestion is that the function of  
7 genes on the ExAC list cannot be maintained if the gene is subject to the standard rate of  
8 mutational change, indicating that their products may play critical roles in the cell<sup>15</sup>. We then  
9 hypothesise that genes from the ExAC list may be over-represented in the CompX list. This  
10 would then provide a filter to identify genes that are both vital to the cell and contribute to  
11 animal complexity.

12

13 A direct comparison shows that 159 of the ExAC list of 3230 genes are represented in the  
14 571 gene CompX list ([Supplementary Data 5](#)). A bootstrap method of 1000 sampling events  
15 shows that the expected overlap between two groups the size of the CompX and ExAC lists,  
16 selected at random from a pool the size of the human gene list, is 92. The observed figure of  
17 159 genes is almost 8 standard deviations greater than the expected mean for the random  
18 selection (Fig. 3A).

Animal complexity and information flow

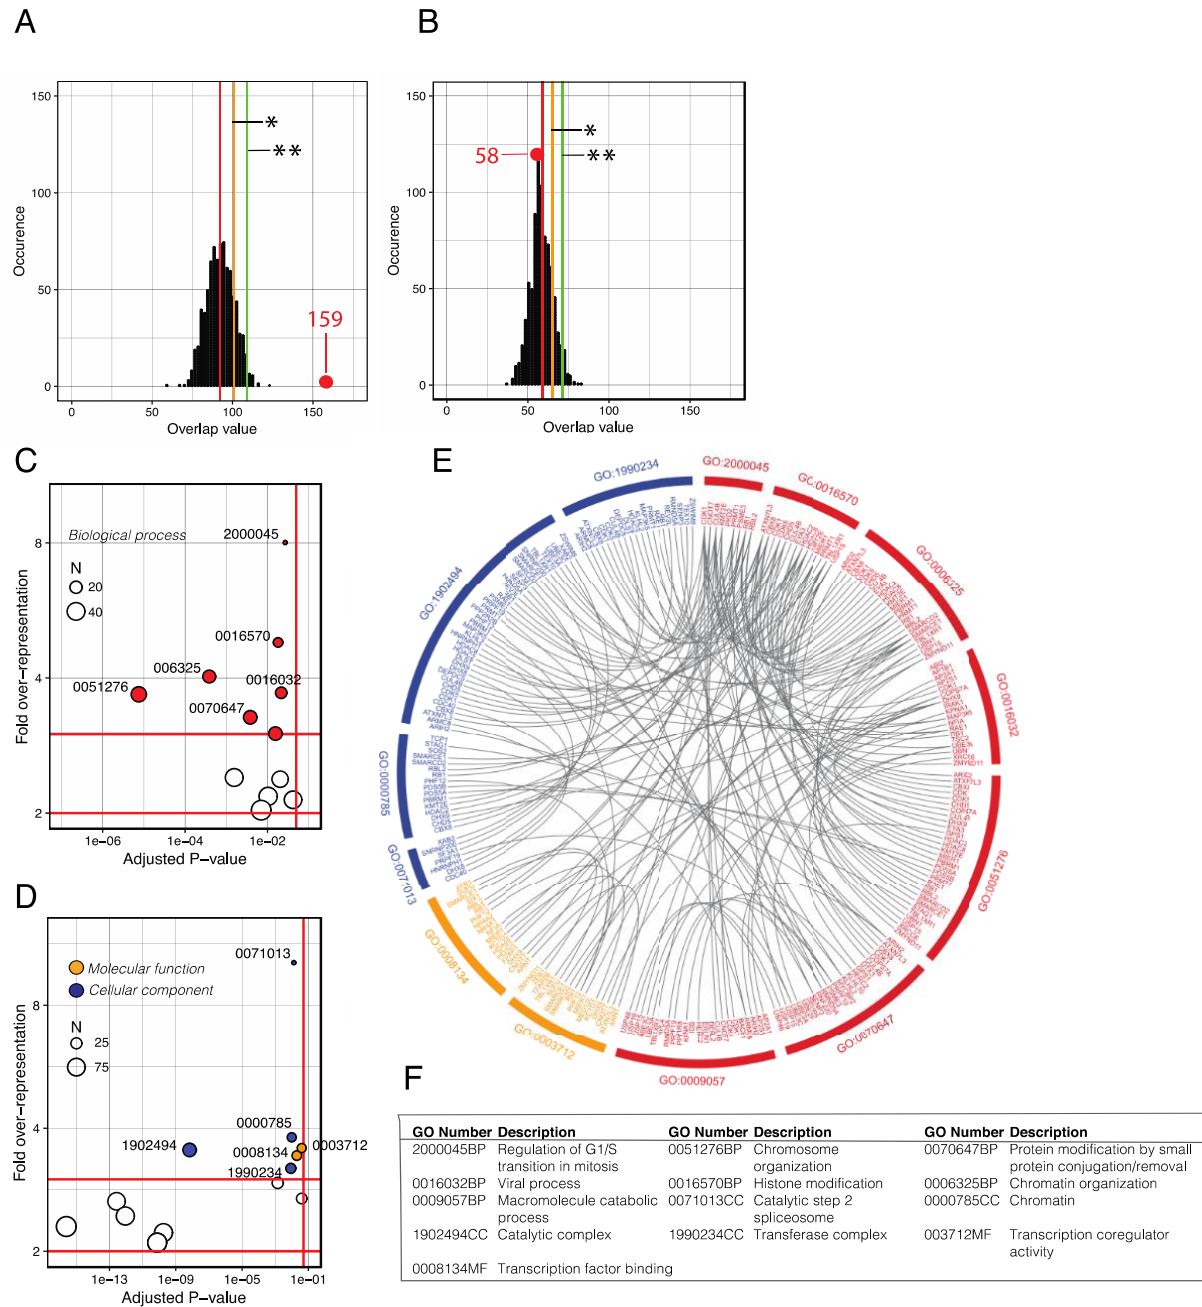

1  
2  
3  
4  
5  
6  
7  
8  
9

Figure 3: Demonstration of a prominent overlap between the 571 complexity genes set and ExAC list

A. The distribution of 1000 predicted overlap values between samples of size 571 corresponding to the complexity ortho-set list and 3230 corresponding to the ExAC gene list taken from a stock of 19908, corresponding to the number of human genes in the analysis. The actual overlap value 159 is marked by the red dot.

- 1 B. The same analysis, repeated using a sample size of 362 corresponding to the  
2 minimal-change ortho-set. In each, the mean is marked by a red line, one standard  
3 deviation from the mean by the amber line (\*) and two standard deviations by the  
4 green line (\*\*).
- 5 C. GO-term over-representation analysis for the complexity and ExAC overlapping  
6 gene list. For the analysis of the general GO-term, Biological Process, the red circles  
7 identify terms over-represented by >3x and with adjusted  $P < 0.05$ .
- 8 D. Combined analysis for the general GO-terms Cellular Component (blue circles)  
9 and Molecular Function (orange circles) (over-represented by >3x and adjusted  
10  $P < 0.05$ ). The identity of the terms over-represented by  $>2 < 3x$  are listed in  
11 [Supplementary Data 6](#).
- 12 E. A Circos plot of the individual genes identifies a high degree of redundancy  
13 between the over-represented GO-terms and a unique list of 90 genes  
14 ([Supplementary Data 6](#)).
- 15 F. Table of the over-represented GO-terms, the colours refer to the major GO-terms  
16 as shown in C and D where red denotes Biological Process, orange is Molecular  
17 Function and blue is Cellular Component.

18

19 In contrast, the same approach, replacing the CompX list with the 362 minimal-change ortho-  
20 set, described above, predicts an overlap with the ExAC list of 58 genes, which is identical to  
21 the observed figure of 58 (Fig. 3B). This approach validates the hypothesis of a relationship  
22 between genes of the CompX and ExAC lists and produces an overlap-list of 159 genes.  
23 Many of the genes resulting from this filter are likely to have both a crucial function in the cell  
24 and critically influence animal complexity.

25

26 *Analysis of the 159 genes that are common to the CompX and ExAC gene lists.*

27 The 159 overlapping genes were subject to GO-term over-representation analysis to  
28 highlight commonalities and the hierarchical terms rationalised using Revigo<sup>24</sup>. GO-terms  
29 were selected that met the criteria of a greater than 3-fold enrichment, when compared to  
30 the standard human genome gene list, and with a probability of less than 0.05 (Fig. 3C and  
31 D). This identified terms across the three major GO-term categories, notably associated  
32 with chromatin dynamics, transcription coregulation, RNA splicing and the cell cycle. In  
33 addition are the terms 'protein modification by small protein conjugation or removal' and  
34 'macromolecule catabolic process' that refer extensively to protein ubiquitination and related  
35 processes including the breakdown of proteins in the proteasome<sup>25</sup> and the elimination of  
36 misfolded proteins in the ER-Golgi system by ERAD<sup>26 27</sup> (Fig. 4).

37

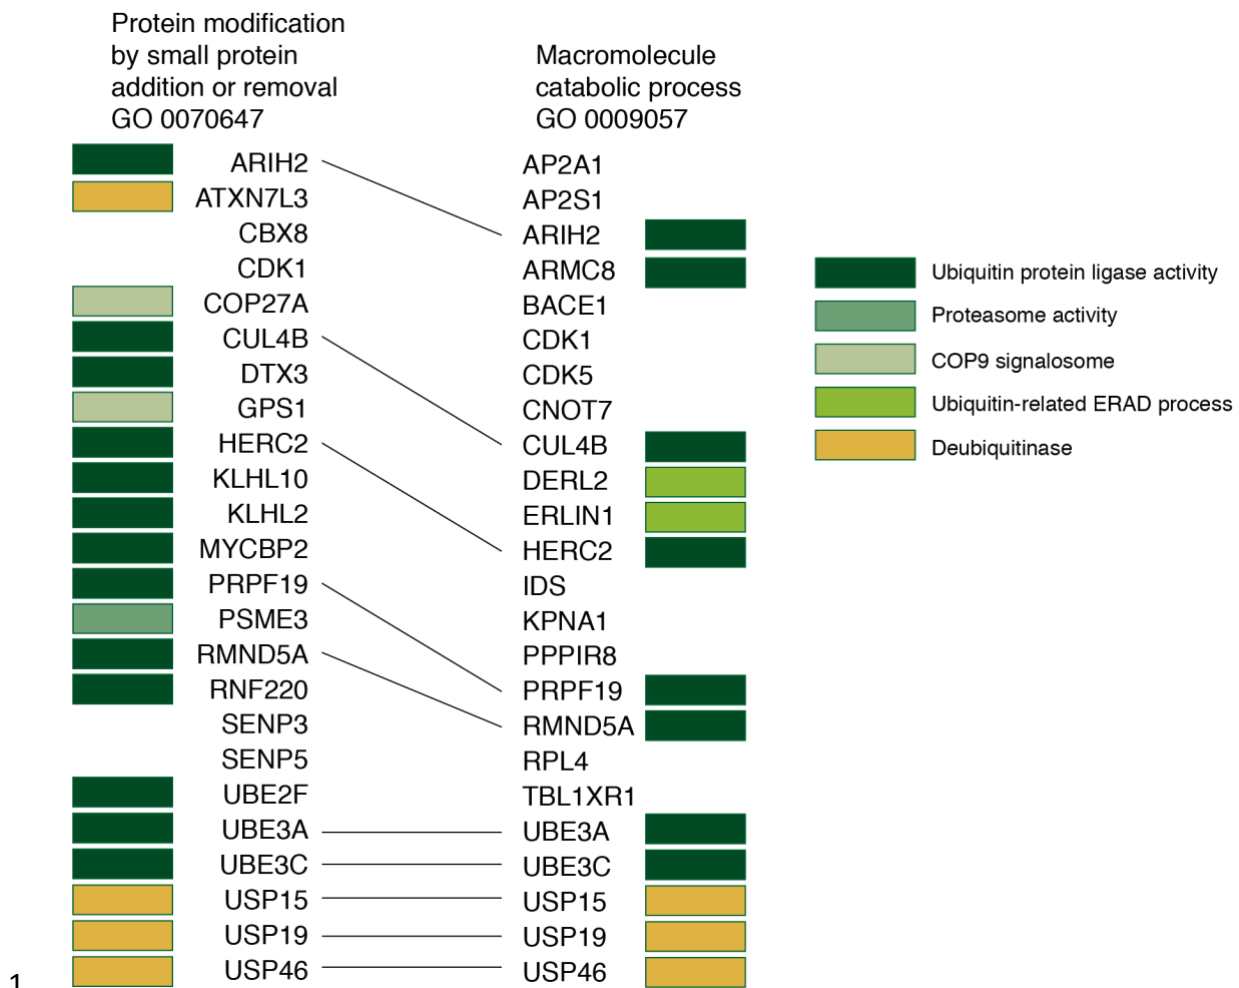

1  
2 Figure 4. The overlap list contains ortho-sets associated with protein ubiquitination  
3 Isolating the overlap between GO:0070647 protein modification by small protein  
4 conjugation or removal and GO:0009057 macromolecule catabolic process, identifies  
5 genes involved in the tagging of proteins with ubiquitin and their recognition for  
6 breakdown in the proteasome and for the removal of misfolded proteins from the ER-  
7 Golgi by the ERAD process.

8  
9 The extensive redundancy of genes within the GO-terms was plotted using Circos and  
10 identifies that 90 of the 159 ortho-sets (61%) are registered in the over-representation GO-  
11 term analysis ([Supplementary Data 6](#)).

12  
13 The products of the 159 overlapping genes were analysed for protein interactions using  
14 STRING (Fig. 5).

15  
16  
17  
18

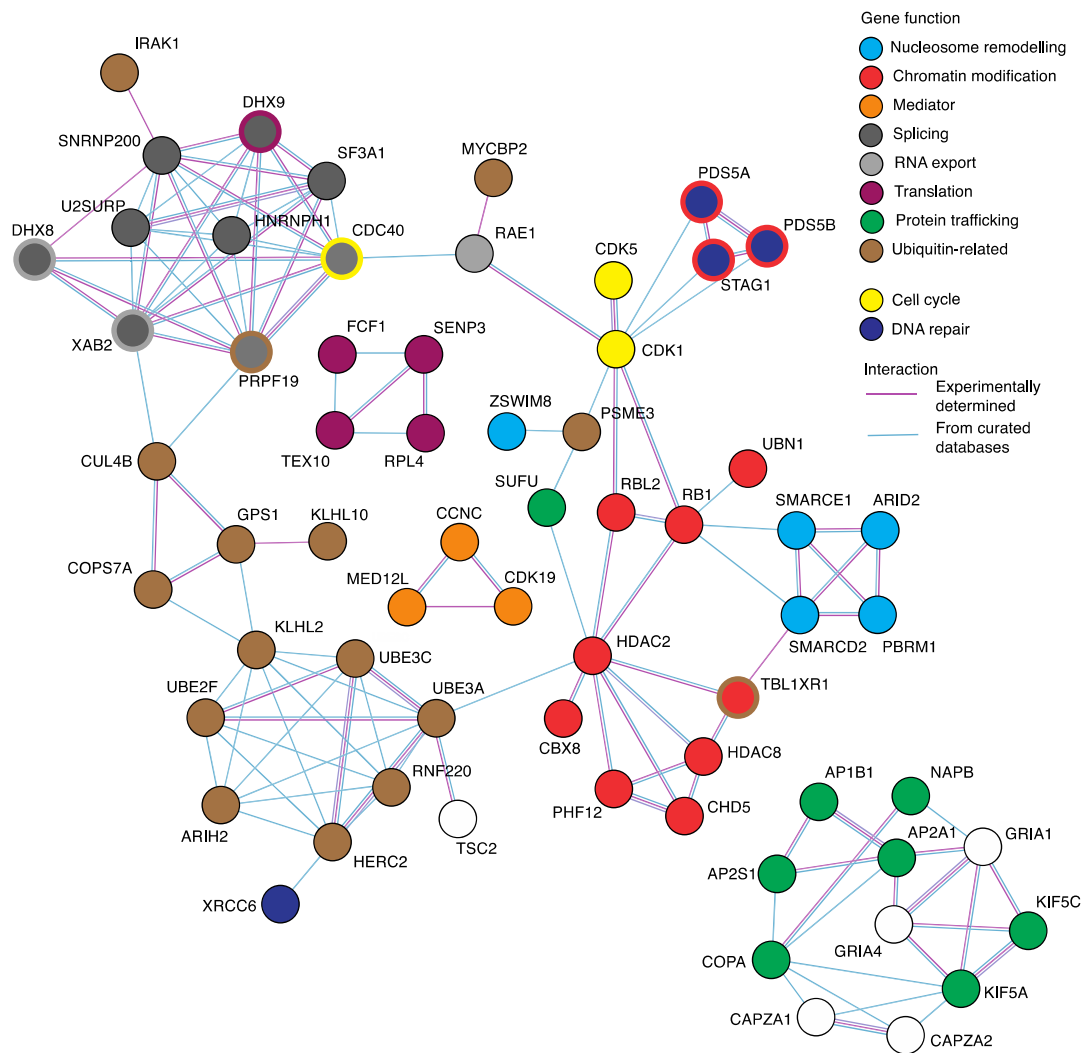

1  
2  
3  
4  
5  
6  
7  
8  
9  
10  
11  
12  
13  
14  
15  
16

Fig 5. Interaction analysis of the CompX versus ExAC overlap gene list.

Only networks with nodes that contained at least three connections are included. Nodes have been coloured to indicate function. The connectivity of the interacting nodes is more than expected for a random selection of genes with a  $p=8.0E-06$ .

STRING analysis identified a range of interacting groups that could be described in terms of the function of the genes, as described in GeneCards and identified eight major and two minor groupings (Fig. 5). Although there may seem to be little in common between the groupings, a closer consideration suggests these are all components that contribute to information flow in the cell, from access to the chromatin to the final removal of the protein. Information flow in the cell can be described as a sequence of seven events (Fig. 6 and see Discussion). In addition, the integrity of the information needs to be maintained by DNA repair mechanisms and information flow integrated with the cell cycle.

1 To address further the possibility that complexity relates to information flow, the functions of  
2 the genes identified in the GO-term analysis that did not appear in the STRING analysis  
3 were similarly categorized by reference to GeneCards<sup>22</sup> and published data. In total 81 of  
4 the 97 genes could be allocated to events relating to information flow. Of the remaining 61  
5 genes, 25 could be similarly allocated, giving a total of 106 out of 159 genes (67%) that are  
6 held in common between the CompX and ExAC gene lists that may play a role in information  
7 flow in the cell ([Supplementary data 7](#)). These genes were mapped to the seven events  
8 (Fig. 6) and those genes that contribute to more than one event indicated. In addition to  
9 DNA repair, the integrity of information flow is maintained by the removal of mis-folded  
10 proteins in the ER-Golgi system through endoplasmic reticulum-associated degradation  
11 (ERAD)<sup>26 27</sup>.

12

13 These results indicate an important relationship between information flow and a cell-type  
14 number, a measure of complexity for multicellular organisms.

15

16

17

18

19

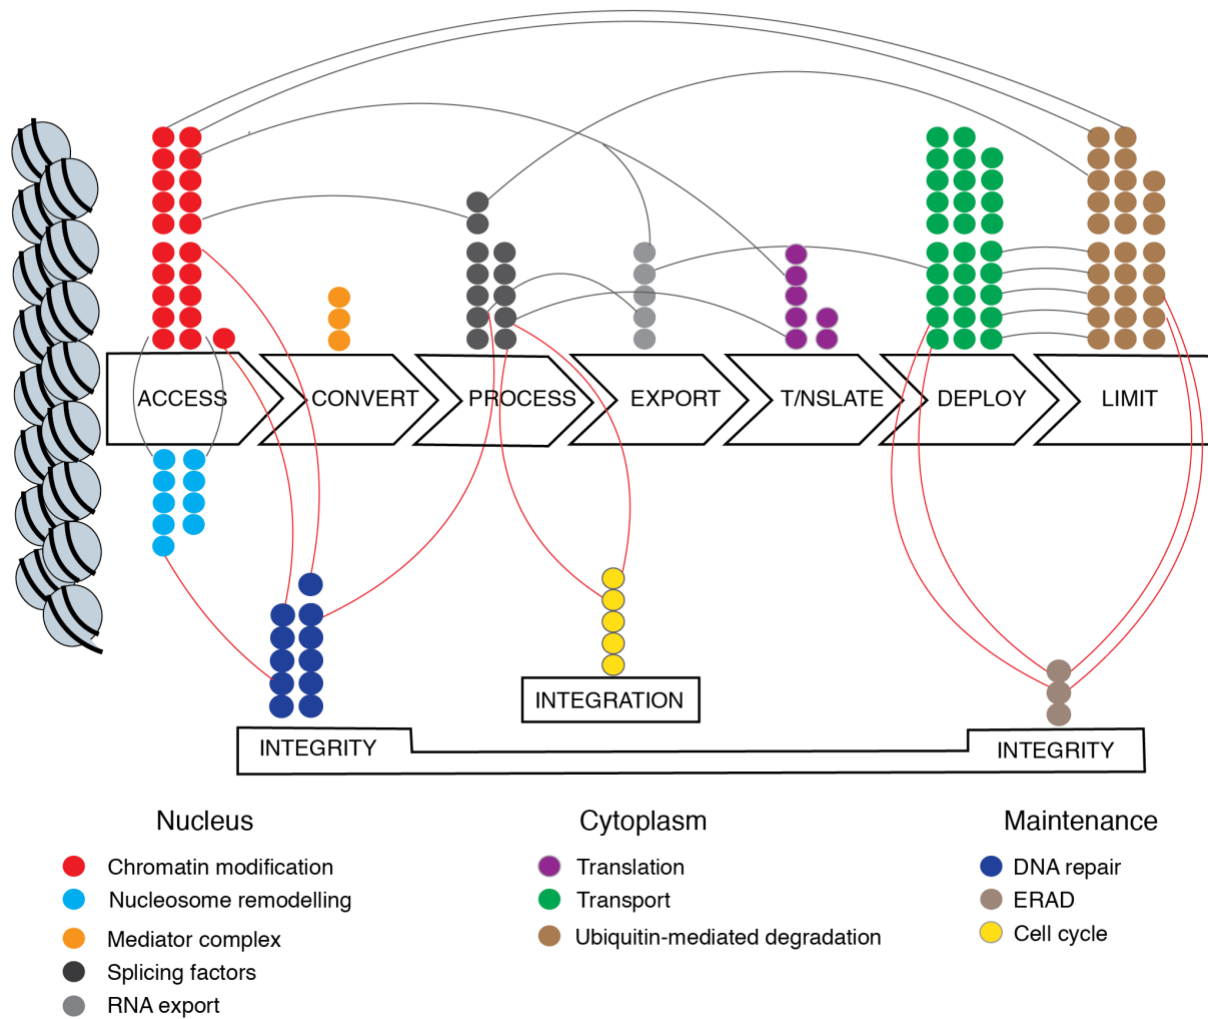

1

2

3 Figure 6 Mapping the CompX-ExAC overlap genes to the elements of information flow in the  
4 cell.

5 Individual genes (coloured circles) are mapped to the seven elements of gene flow and to  
6 the two maintenance factors, integrity and integration. Justification for the allocation is  
7 given in [Supplementary Data 7](#). The contribution of one gene product to more than one  
8 element is marked by a connecting arc.

9

10

## 11 Discussion

12 In this paper, we use a simple approach to data-mine three variables that define and  
13 quantify the functional diversity ( $D_F$ ) of proteins derived from each human gene and its  
14 orthologues from up to eight other species (termed an ortho-set). The change in  $D_F$  for each  
15 gene is correlated with the change in number of different cell types in the species, a proxy  
16 for organismal complexity, to identify 571 ortho-sets with a positive correlation.

1 This approach subscribes to a specific model in which incremental changes in functional  
2 diversity across an ortho-set relate to an incremental change in complexity. Alternative  
3 models, in which, for example, major changes in functional diversity occur at a specific point  
4 in the phylogeny, are also likely and can be extracted from our data set ([Supplementary  
5 Data 2](#)). Whilst individual genes, acting in isolation, are likely to relate complexity in either  
6 model, GO-term over-representation and interaction analysis point towards processes and  
7 systems and it is these that will contribute to a broader understanding of the basis of  
8 organismal complexity.

9  
10 This paper considers functional diversity, but this will be only one of several factors  
11 associated with animal complexity. Amongst others, an increasing diversity in cis-acting  
12 regulatory elements (CAREs) across a phylogeny will play a role<sup>4 5 28</sup> and there may also be  
13 a contribution to complexity from changes to the complement of regulatory non-coding  
14 RNAs, including the miRNAs<sup>29 30</sup> and lncRNAs that have been shown to modulate gene  
15 expression<sup>31</sup>.

16  
17 We have not been able to include all the factors that affect protein functional diversity in this  
18 analysis. For example, short linear motifs (SLiMs)<sup>23</sup> impact on the function of proteins such  
19 as NCoR2<sup>11</sup>, but these are not currently widely annotated. The functional capabilities of a  
20 protein may also be honed by a small number of changes within the sequence that affect  
21 neither protein domain number, nor the range of isoforms<sup>32</sup>. Lack of this data may mean that  
22 some ortho-sets that contribute to complexity have not been identified.

23  
24 Other studies have successfully identified the contribution of individual components to  
25 complexity, such as protein domains and alternative splicing<sup>1 2</sup>. A previous paper used the  
26 approach taken here to assess genes broadly associated with transcription, as listed in the  
27 AnimalTFDB 2.0 database of 2087 human genes<sup>14</sup>. The identified ortho-sets that are  
28 primarily involved in the dynamic structure and function of chromatin, including nucleosome  
29 remodeling, the modulation of chromatin activity and the Mediator function. By extending the  
30 analysis to the whole genome we aimed to expand this selection to include events outside  
31 the nucleus. GO-term over-representation analysis (Fig. 1A) indicated that the oxidation of  
32 alcohol, mRNA processing, notably splicing, aspects of DNA repair and protein transport via  
33 vesicles should also be considered. For the oxidation of alcohol, the main component of  
34 functional diversity is the reiterative gene duplication followed by sub- and neo-  
35 functionalization that have produced a range of enzymes that metabolize ethanol and related  
36 alcohols<sup>33 34</sup>. Analysis of interactions amongst the CompX ortho-sets via STRING identified  
37 components of the spliceosome and of vesicular transport and in addition highlights



1 chromatin remodeling and the Mediator complex, consistent with the results from the  
2 previous, more limited, survey<sup>14</sup>.

3  
4 In this paper we apply an additional filter by identifying the overlap between the CompX and  
5 ExAC genes lists. The ExAC genes have less than expected variation within the human  
6 population, suggesting they play important functions that are sensitive to mutation<sup>15</sup>. This  
7 might seem to contradict the essence of the CompX list, which selects for increases in  
8 functional diversity, but the CompX list reflects changes between orthologues across a wide  
9 phylogeny, rather than variation within a single species. There is a greater than expected  
10 overlap between the CompX list and the ExAC list that is not seen when the ExAC list is  
11 compared to the 'minimal-change' list of genes selected for minimally changing values of  
12 functional diversity (Fig. 4). The hypothesis is that the filter will highlight those ortho-sets  
13 that both relate to complexity and are important to the function of the cell, allowing the  
14 identification of cellular processes that are critical for organismal complexity.

15  
16 Within the overlap list, GO-term analysis identified sub-terms associated with chromatin  
17 dynamics, the spliceosome, protein modification by ubiquitination and the cell cycle.  
18 Interaction analysis similarly identified ortho-sets associated with mRNA splicing and  
19 chromatin dynamics, notably nucleosome remodeling, ubiquitin-mediated protein turnover  
20 and, in addition, ortho-sets that encode proteins involved in the distribution of proteins via  
21 vesicles within the ER-Golgi apparatus.

22  
23 Is there a common theme? Each of these groupings can be directly related to the concept of  
24 information flow in the cell. We hypothesise that the contribution of protein functional  
25 diversity to complexity is primarily, though not exclusively, at the level of information flow in  
26 the cell. Information flow can be explained in terms of seven sequential elements (Fig. 6).  
27 First, nucleosome re-modelling and epigenetic marks regulate *access* to chromatin, flipping  
28 chromatin between states that either promote or repress gene expression<sup>35 36 37 38 39</sup>. The  
29 Mediator complex then promotes interactions between distant enhancer elements and the  
30 genes to be expressed<sup>40 41</sup> which in combination with transcription factors and RNA  
31 polymerases will *convert* the primary information to the intermediate, RNA. The division of  
32 eukaryotic genes into exons and introns requires subsequent *processing* of the primary  
33 transcript by the spliceosome<sup>42 43</sup> before *export* of the RNA to the cytosol where it is  
34 *translated* to protein. The next step in cellular information flow is one of logistics, *deploying*  
35 the product to the right location and in the correct format. Vesicular transport in the cell,  
36 associated with the ER-Golgi apparatus, transports proteins to the cell surface and for  
37 secretion<sup>15</sup>, destinations that will be important as multicellular organisms gain in complexity

1 and require signaling between cell types. Finally, the specific and regulated addition and  
2 removal of ubiquitin<sup>44</sup>, coupled with the proteasome, ensures that specific proteins are  
3 turned over, to provide a *limitation* to the pathway of information flow<sup>45 46</sup>.

4  
5 We have also identified a number of genes whose function can be ascribed to maintaining  
6 the integrity of the information flow. These include DNA repair functions that are important  
7 for the stored information and processes such as ERAD that take place in the endoplasmic  
8 reticulum to remove defective proteins<sup>27</sup>. Unsurprisingly, information flow needs to be  
9 coordinated to the cell cycle and a number of genes that function in both have been  
10 identified (Fig. 6 and [Supplementary data 7](#)).

11  
12 We can speculate that the increased range of functions of key proteins at each stage  
13 increases the efficiency of information flow through processes of neo- and sub-  
14 functionalization of paralogues and isoforms<sup>47</sup>. Whilst this paper identifies a general trend,  
15 further analysis of specific genes will be required to determine precisely how these  
16 efficiencies are achieved. It is clear, though, that the genes identified in this analysis do not  
17 greatly affect the cell-type specific activities of different differentiated cell types, rather they  
18 relate to the processing of information to generate those specific activities. Applying the  
19 concept of information flow within the cell is important because it will provide the context for  
20 a more detailed analysis and understanding of animal complexity.

## 21 22 **Acknowledgements**

23 We would like to thank members of the Science Faculty, University of Portsmouth, for critical  
24 comments. JD, DLC and CS are grateful for University of Portsmouth Master's support, a  
25 PhD bursary with Professor A. Callaghan and research support, respectively.

## 26 27 **Contributions**

28 JD collected and analysed the data, DLC analysed the data and CS analysed the data and  
29 wrote the manuscript.

## 30 31 **Competing interests**

32 The authors declare no competing interests.

## 33 34 **Data availability**

35 The authors declare that all other data supporting the findings of this study are available in  
36 the paper, in its supplementary information files (S1 and S3-7 are attached at the end of this  
37 document) and S2 is available in the University of Portsmouth repository, PURE, at DOI:

1 10.17029/3d3b91c7-3ae2-4ef8-9703-852709d04a8f and (S2-7) at  
2 <https://github.com/colin17/complexity.git> .

3

4

### 5 **Code availability**

6 The code used, in R, to extract data from the Ensembl database is freely available at  
7 <https://github.com/JackDean1/OrganismComplexity>.

8

### 9 **Supplementary information**

10 **S1** Table of the genome data used in this research.

11 **S2** Table of calculations of functional diversity for all genes across the eight species  
12 (CSV format).

13 **S3** The CompX list of genes (CSV format)

14 **S4** GO-term details for the CompX gene list (CSV format)

15 **S5** The CompX-ExAC overlap list of genes (CSV format)

16 **S6** GO-term details for the CompX-ExAC overlap gene list (CSV format)

17 **S7** CompX-ExAC overlap gene list, functional details (CSV format)

18

19

### 20 **References**

21 1. Vogel C, Chothia C. Protein family expansions and biological complexity. *PLoS*  
22 *Comput Biol.* 2006. doi:10.1371/journal.pcbi.0020048

23 2. Chen L, Bush SJ, Tovar-Corona JM, Castillo-Morales A, Urrutia AO. Correcting for  
24 differential transcript coverage reveals a strong relationship between alternative  
25 splicing and organism complexity. *Mol Biol Evol.* 2014. doi:10.1093/molbev/msu083

26 3. Baltimore D. Our genome unveiled. *Nature.* 2001. doi:10.1038/35057267

27 4. Levine M, Tjian R. Transcription regulation and animal diversity. *Nature.* 2003.  
28 doi:10.1038/nature01763

29 5. Wray GA. The evolutionary significance of cis-regulatory mutations. *Nat Rev Genet.*  
30 2007. doi:10.1038/nrg2063

31 6. Chan, Frank Y, Marks, et al. Adaptive Evolution of Pelvic Reduction in Sticklebacks by  
32 Recurrent Deletion of a Pitx1 Enhancer. *Science (80- )*. 2009.  
33 doi:10.1126/science.1182213

34 7. Sackton TB, Grayson P, Cloutier A, et al. Convergent regulatory evolution and the  
35 origin of flightlessness in palaeognathous birds. *bioRxiv.* 2018. doi:10.1101/262584

36 8. Ecker JR, Bickmore WA, Barroso I, Pritchard JK, Gilad Y, Segal E. Genomics:  
37 ENCODE explained. *Nature.* 2012. doi:10.1038/489052a

- 1 9. Frankish A, Vullo A, Zadissa A, et al. Ensembl 2018. *Nucleic Acids Res.* 2017.  
2 doi:10.1093/nar/gkx1098
- 3 10. Schad E, Tompa P, Hegyi H. The relationship between proteome size, structural  
4 disorder and organism complexity. *Genome Biol.* 2011. doi:10.1186/gb-2011-12-12-  
5 r120
- 6 11. Short S, Peterkin T, Guille M, Patient R, Sharpe C. Short linear motif acquisition, exon  
7 formation and alternative splicing determine a pathway to diversity for NCoR-family  
8 co-repressors. *Open Biol.* 2015. doi:10.1098/rsob.150063
- 9 12. Conant GC, Wolfe KH. Turning a hobby into a job: How duplicated genes find new  
10 functions. *Nat Rev Genet.* 2008. doi:10.1038/nrg2482
- 11 13. He X, Zhang J. Rapid subfunctionalization accompanied by prolonged and substantial  
12 neofunctionalization in duplicate gene evolution. *Genetics.* 2005.  
13 doi:10.1534/genetics.104.037051
- 14 14. Lopes Cardoso D, Sharpe C. Relating protein functional diversity to cell type number  
15 identifies genes that determine dynamic aspects of chromatin organisation as  
16 potential contributors to organismal complexity. *PLoS One.* 2017.  
17 doi:10.1371/journal.pone.0185409
- 18 15. Lek M, Karczewski KJ, Minikel E V., et al. Analysis of protein-coding genetic variation  
19 in 60,706 humans. *Nature.* 2016. doi:10.1038/nature19057
- 20 16. Sigrist CJA, Cerutti L, Hulo N, et al. PROSITE: a documented database using  
21 patterns and profiles as motif descriptors. *Brief Bioinform.* 2002.  
22 doi:10.1093/bib/3.3.265
- 23 17. Hedges SB, Blair JE, Venturi ML, Shoe JL. A molecular timescale of eukaryote  
24 evolution and the rise of complex multicellular life. *BMC Evol Biol.* 2004.  
25 doi:10.1186/1471-2148-4-2
- 26 18. Blake JA, Christie KR, Dolan ME, et al. Gene ontology consortium: Going forward.  
27 *Nucleic Acids Res.* 2015. doi:10.1093/nar/gku1179
- 28 19. Mi H, Huang X, Muruganujan A, et al. PANTHER version 11: Expanded annotation  
29 data from Gene Ontology and Reactome pathways, and data analysis tool  
30 enhancements. *Nucleic Acids Res.* 2017. doi:10.1093/nar/gkw1138
- 31 20. Mi H, Muruganujan A, Casagrande JT, Thomas PD. Large-scale gene function  
32 analysis with the panther classification system. *Nat Protoc.* 2013.  
33 doi:10.1038/nprot.2013.092
- 34 21. Szklarczyk D, Morris JH, Cook H, et al. The STRING database in 2017: Quality-  
35 controlled protein-protein association networks, made broadly accessible. *Nucleic*  
36 *Acids Res.* 2017. doi:10.1093/nar/gkw937
- 37 22. Stelzer G, Rosen R, Plaschkes I, et al. GeneCards - the human gene database. The

- 1 GeneCards Suite: From Gene Data Mining to Disease Genome Sequence Analysis,  
2 Current Protocols in Bioinformatics. doi:<https://doi.org/10.1002/cpbi.5>
- 3 23. Weatheritt RJ, Gibson TJ. Linear motifs: Lost in (pre)translation. *Trends Biochem Sci.*  
4 2012. doi:[10.1016/j.tibs.2012.05.001](https://doi.org/10.1016/j.tibs.2012.05.001)
- 5 24. Supek F, Bošnjak M, Škunca N, Šmuc T. Revigo summarizes and visualizes long lists  
6 of gene ontology terms. *PLoS One.* 2011. doi:[10.1371/journal.pone.0021800](https://doi.org/10.1371/journal.pone.0021800)
- 7 25. Kwon YT, Ciechanover A. The Ubiquitin Code in the Ubiquitin-Proteasome System  
8 and Autophagy. *Trends Biochem Sci.* 2017. doi:[10.1016/j.tibs.2017.09.002](https://doi.org/10.1016/j.tibs.2017.09.002)
- 9 26. Olzmann JA, Kopito RR, Christianson JC. The mammalian endoplasmic reticulum-  
10 associated degradation system. *Cold Spring Harb Perspect Biol.* 2013.  
11 doi:[10.1101/cshperspect.a013185](https://doi.org/10.1101/cshperspect.a013185)
- 12 27. Christianson JC, Ye Y. Cleaning up in the endoplasmic reticulum: Ubiquitin in charge.  
13 *Nat Struct Mol Biol.* 2014. doi:[10.1038/nsmb.2793](https://doi.org/10.1038/nsmb.2793)
- 14 28. Simpson P, Ayyar S. Chapter 3 Evolution of Cis-Regulatory Sequences in Drosophila.  
15 *Adv Genet.* 2008. doi:[10.1016/S0065-2660\(07\)00003-X](https://doi.org/10.1016/S0065-2660(07)00003-X)
- 16 29. Lee C-T, Risom T, Strauss WM. Evolutionary Conservation of MicroRNA Regulatory  
17 Circuits: An Examination of MicroRNA Gene Complexity and Conserved MicroRNA-  
18 Target Interactions through Metazoan Phylogeny. *DNA Cell Biol.* 2007.  
19 doi:[10.1089/dna.2006.0545](https://doi.org/10.1089/dna.2006.0545)
- 20 30. Mao X, Li L, Cao Y. Evolutionary comparisons of miRNA regulation system in six  
21 model organisms. *Genetica.* 2014. doi:[10.1007/s10709-014-9758-5](https://doi.org/10.1007/s10709-014-9758-5)
- 22 31. Kapusta A, Feschotte C. Volatile evolution of long noncoding RNA repertoires:  
23 Mechanisms and biological implications. *Trends Genet.* 2014.  
24 doi:[10.1016/j.tig.2014.08.004](https://doi.org/10.1016/j.tig.2014.08.004)
- 25 32. Hardwick LJA, Philpott A. The N terminus of Ascl1 underlies differing proneural  
26 activity of mouse and Xenopus Ascl1 proteins. *Wellcome Open Res.* 2018.  
27 doi:[10.12688/wellcomeopenres.14842.1](https://doi.org/10.12688/wellcomeopenres.14842.1)
- 28 33. González-Duarte R, Albalat R. Merging protein, gene and genomic data: The  
29 evolution of the MDR-ADH family. *Heredity (Edinb).* 2005. doi:[10.1038/sj.hdy.6800723](https://doi.org/10.1038/sj.hdy.6800723)
- 30 34. Thompson CE, Freitas LB, Salzano FM. Molecular evolution and functional  
31 divergence of alcohol dehydrogenases in animals, fungi and plants. *Genet Mol Biol.*  
32 2018. doi:[10.1590/1678-4685-gmb-2017-0047](https://doi.org/10.1590/1678-4685-gmb-2017-0047)
- 33 35. Struhl K, Segal E. Determinants of nucleosome positioning. *Nat Struct Mol Biol.* 2013.  
34 doi:[10.1038/nsmb.2506](https://doi.org/10.1038/nsmb.2506)
- 35 36. Tessarz P, Kouzarides T. Histone core modifications regulating nucleosome structure  
36 and dynamics. *Nat Rev Mol Cell Biol.* 2014. doi:[10.1038/nrm3890](https://doi.org/10.1038/nrm3890)
- 37 37. Strahl BD, Allis CD. The language of covalent histone modifications. *Nature.* 2000.

- 1           doi:10.1038/47412
- 2   38.   Becker PB, Horz W. ATP-dependent nucleosome modeling. *Annu Rev Biochem.*
- 3           2002.
- 4   39.   Narlikar GJ, Sundaramoorthy R, Owen-Hughes T. Mechanisms and functions of ATP-
- 5           dependent chromatin-remodeling enzymes. *Cell.* 2013. doi:10.1016/j.cell.2013.07.011
- 6   40.   Soutourina J. Transcription regulation by the Mediator complex. *Nat Rev Mol Cell Biol.*
- 7           2018. doi:10.1038/nrm.2017.115
- 8   41.   Allen BL, Taatjes DJ. The Mediator complex: A central integrator of transcription. *Nat*
- 9           *Rev Mol Cell Biol.* 2015. doi:10.1038/nrm3951
- 10 42.   Shi Y. Mechanistic insights into precursor messenger RNA splicing by the
- 11           spliceosome. *Nat Rev Mol Cell Biol.* 2017. doi:10.1038/nrm.2017.86
- 12 43.   Herzel L, Ottoz DSM, Alpert T, Neugebauer KM. Splicing and transcription touch
- 13           base: Co-transcriptional spliceosome assembly and function. *Nat Rev Mol Cell Biol.*
- 14           2017. doi:10.1038/nrm.2017.63
- 15 44.   Lim, R., Nolte, H., Andrade, J., Zimmermann, B., Shi, C., Doddaballapur, A., Ong,
- 16           Y.T., Wilhelm, K., Fasse, J.W.D., Ernst, A., Kaulich, M., Husnjak, K., Boettger, T.,
- 17           Guenther, S., Braun, T., Benedito, R., Dikic, I., Potente M. Deubiquitinase USP10
- 18           regulates Notch signaling in the endothelium. *Science (80- ).* 2019;364:188-193.
- 19           www.sciencemag.org/content/364/6436/188/suppl/DC1.
- 20 45.   Varshavsky A. The Ubiquitin System, Autophagy, and Regulated Protein Degradation.
- 21           *Annu Rev Biochem.* 2017. doi:10.1146/annurev-biochem-061516-044859
- 22 46.   Kleiger G, Mayor T. Perilous journey: A tour of the ubiquitin-proteasome system.
- 23           *Trends Cell Biol.* 2014. doi:10.1016/j.tcb.2013.12.003
- 24 47.   Zhang J. Evolution by gene duplication: An update. *Trends Ecol Evol.* 2003.
- 25           doi:10.1016/S0169-5347(03)00033-8

26

27

28

29

30

31

32   Supplementary data

33   **Supplementary Data S1, S3-7**

34

35   **S1**

36   **Supplementary Table 1**

37

| Organism                | Classification | Genome version | Gene number <sup>1</sup> | Cell type Number <sup>2</sup> |
|-------------------------|----------------|----------------|--------------------------|-------------------------------|
| Homo sapiens            | Mammal         | GRCh38.p12     | 20,418                   | 171                           |
| Macacca mulata          | Mammal         | Mmul_8.0.1     | 21,099                   | 171                           |
| Mus musculus            | Mammal         | GRCm38.p6      | 22,600                   | 157                           |
| Gallus gallus           | Bird           | GRCg6a         | 16,878                   | 150                           |
| Xenopus tropicalis      | Amphibian      | JGI 4.2        | 18,442                   | 121                           |
| Takifugu rubripes       | Bony fish      | FUGU5          | 20,545                   | 114                           |
| Ciona intestinalis      | Urochordate    | KH             | 16,671                   | 71                            |
| Drosophila melanogaster | Insect         | BDGP6          | 13,931                   | 60                            |
| Caenorhabditis elegans  | Nematode worm  | WBcel235       | 20,222                   | 29                            |

1  
2  
3  
4  
5  
6  
7  
8  
9

1. As given on the Ensembl database

2. Cell type number taken from :

Vogel C, Chothia C (2006) Protein family expansions and biological complexity. PLoS Comput Biol 2: e48.

pmid:16733546

Hedges SB, Blair JE, Venturi ML, Shoe JL (2004) A molecular timescale of eukaryote evolution and the rise of complex multicellular life. BMC Evol Biol 4: 2. pmid:15005799

## Animal complexity and information flow

24

1 **S3**  
2 Compx gene list,,"""Flat"" list",,  
3 ABI2,,ABHD2,,  
4 AC235565.2,,ADORA2A,,  
5 ACOT11,,AGPAT5,,  
6 ACOT7,,AK6,,  
7 ACSS2,,ALAD,,  
8 ADAM15,,ALG1,,  
9 ADAM8,,ALG10,,  
10 ADAMTS3,,ALG10B,,  
11 ADH1A,,ALG8,,  
12 ADH1B,,AMT,,  
13 ADH1C,,ANAPC10,,  
14 ADH4,,ANKZF1,,  
15 ADH5,,ANXA6,,  
16 ADH6,,ARHGDIA,,  
17 ADH7,,ARL5A,,  
18 ADORA3,,ARPC1B,,  
19 ADSS,,ASAH1,,  
20 AGBL4,,ASMT,,  
21 AHCYL1,,ASRGL1,,  
22 AKR1A1,,ATG12,,  
23 ALAS2,,ATG13,,  
24 ALDH1L1,,ATG9B,,  
25 ANKRD50,,ATP13A1,,  
26 AP1B1,,ATP6V0D1,,  
27 AP1S1,,ATP6V1G3,,  
28 AP1S2,,BBS1,,  
29 AP2A1,,BBS2,,  
30 AP2S1,,BCKDHA,,  
31 AP3S2,,BCL6,,  
32 APP,,BTBD3,,  
33 ARAP2,,BYSL,,  
34 ARFGAP1,,C15orf41,,  
35 ARG2,,C1QTNF1,,  
36 ARHGDIB,,C9orf64,,  
37 ARID2,,CACYPB,,  
38 ARIH2,,CAPSL,,  
39 ARL14EP,,CARHSP1,,  
40 ARL15,,CAV2,,  
41 ARMC8,,CCDC124,,  
42 ARNT,,CCDC181,,  
43 ARPC5,,CCDC25,,  
44 ASCL3,,CCNG1,,  
45 ASF1B,,CCS,,  
46 ASNA1,,CCZ1B,,  
47 ATG2A,,CDC16,,  
48 ATP5F1A,,CENPV,,  
49 ATP6V1E1,,CEP78,,  
50 ATXN7L3,,CFAP157,,  
51 BACE1,,CFAP57,,  
52 BANF2,,CHMP7,,  
53 BBS9,,CHRM2,,  
54 BCAP29,,CHSY1,,  
55 BCL7B,,CHSY3,,  
56 BCL7C,,CIRBP,,  
57 BET1,,CLNS1A,,  
58 BET1L,,CLPTM1L,,



## Animal complexity and information flow

25

1 BLM,,CMC1,,  
2 BNC2,,CMC2,,  
3 BPNT1,,CMTR2,,  
4 BSDC1,,CNDP2,,  
5 BUB3,,CNKSR2,,  
6 C1D,,COASY,,  
7 C1QTNF3,,COL4A3BP,,  
8 CA2,,COPB1,,  
9 CA5A,,COX11,,  
10 CALHM3,,CPA1,,  
11 CALHM4,,CPA4,,  
12 CALHM6,,CPLX2,,  
13 CAPN3,,CPSF2,,  
14 CAPZA1,,CPSF7,,  
15 CAPZA2,,CRAMP1,,  
16 CASP2,,CRBN,,  
17 CBLN2,,CSTF1,,  
18 CBX6,,CTCF,,  
19 CBX8,,CTNNB1,,  
20 CCDC151,,CTNNBIP1,,  
21 CCNC,,CTSB,,  
22 CCND1,,DAD1,,  
23 CCNH,,DCAF13,,  
24 CCZ1,,DDB1,,  
25 CCZ1B,,DDX6,,  
26 CD63,,DECR1,,  
27 CDC20,,DGCR8,,  
28 CDC40,,DHRS2,,  
29 CDCA7,,DHX36,,  
30 CDK1,,DHX38,,  
31 CDK11A,,DLX4,,  
32 CDK11B,,DMGDH,,  
33 CDK19,,DMRT2,,  
34 CDK20,,DNAAF3,,  
35 CDK5,,DNAAF5,,  
36 CDK7,,DNAJC18,,  
37 CERS5,,DPH1,,  
38 CHD5,,DPH2,,  
39 CHMP2B,,DPP9,,  
40 CIB2,,DTWD1,,  
41 CIB3,,DUOX1,,  
42 CLASRP,,DUS4L,,  
43 CLIC4,,DYM,,  
44 CLIC5,,DYNC2LI1,,  
45 CLIC6,,EARS2,,  
46 CMTM6,,EDC3,,  
47 CNIH1,,EEF1AKMT2,,  
48 CNIH4,,EEPDI,,  
49 CNOT7,,EFCAB2,,  
50 COBL,,EFHC1,,  
51 COL12A1,,EFHD1,,  
52 COL14A1,,EIF1AD,,  
53 COL6A1,,EIF3B,,  
54 COL6A2,,EIF3C,,  
55 COLQ,,EIF3F,,  
56 COMMD7,,EIF3H,,  
57 COPA,,ELP2,,  
58 COPS7A,,ELP4,,

## Animal complexity and information flow

26

1 COPZ1,, EMC4,,  
2 COQ8B,, EMC7,,  
3 COQ9,, ENKUR,,  
4 CPSF4,, ENO1,,  
5 CRYZL1,, ERCC3,,  
6 CTTNBP2,, EXTL3,,  
7 CUL4B,, FAM185A,,  
8 CWC27,, FAM72A,,  
9 DAP3,, FAM72B,,  
10 DBT,, FAXDC2,,  
11 DEPDC5,, FBXL16,,  
12 DERL2,, FEM1B,,  
13 DHX8,, FGL1,,  
14 DHX9,, FICD,,  
15 DIS3L2,, FMC1,,  
16 DLST,, FNIP1,,  
17 DNTTIP2,, FNTA,,  
18 DOK1,, FRMD6,,  
19 DOK6,, FRS2,,  
20 DOPEY1,, FTCD,,  
21 DPH5,, GAS8,,  
22 DTL,, GATB,,  
23 DTX3,, GATC,,  
24 EEF1B2,, GATM,,  
25 EEF1D,, GCNT3,,  
26 EIF1,, GDF9,,  
27 EIF1B,, GLDC,,  
28 EIF3E,, GOSR1,,  
29 ELFN1,, GOSR2,,  
30 EMC9,, GPALPP1,,  
31 EML4,, GPR89A,,  
32 EMSY,, HAAO,,  
33 ENTPD5,, HADH,,  
34 ERCC2,, HAO2,,  
35 ERGIC1,, HEXB,,  
36 ERLIN1,, HSD17B4,,  
37 ETHE1,, HSPA9,,  
38 EXOC6,, HYDIN,,  
39 EXOC7,, IFT74,,  
40 EXOSC6,, IMMP1L,,  
41 EXT2,, IMP3,,  
42 EYA3,, INTS12,,  
43 FAM120B,, INTS14,,  
44 FAM160A1,, INTS9,,  
45 FAM172A,, IQUB,,  
46 FAM206A,, IRAK4,,  
47 FAM49B,, JOSD1,,  
48 FAM92A,, KATNB1,,  
49 FAM98C,, KCNC4,,  
50 FANCD2,, KDELR2,,  
51 FBLL1,, KDELR3,,  
52 FBXO8,, LACTB,,  
53 FCF1,, LARP7,,  
54 FN1,, LARS,,  
55 FO393400.1,, LCMT1,,  
56 FOXP1,, LGMN,,  
57 FREM1,, LIG4,,  
58 GABARAP,, LONP1,,

## Animal complexity and information flow

27

1 GCAT,,LRRC6,,  
2 GDPD5,,LTN1,,  
3 GFOD1,,MAATS1,,  
4 GFOD2,,MAGEA2,,  
5 GGA3,,MAGEA2B,,  
6 GNA13,,MAGEA4,,  
7 GNG2,,MAPK10,,  
8 GNG3,,MCM4,,  
9 GNL1,,MCTS1,,  
10 GPATCH1,,MED17,,  
11 GPC1,,MED22,,  
12 GPC2,,MED9,,  
13 GPS1,,MFSD8,,  
14 GRIA1,,MIOS,,  
15 GRIA4,,MLEC,,  
16 GRIK1,,MLST8,,  
17 GRIK2,,MOGS,,  
18 GRTP1,,MORN5,,  
19 GSX2,,MPPE1,,  
20 GTF3A,,MRPL11,,  
21 GUCY1B1,,MRPL16,,  
22 H2AFV,,MRPL22,,  
23 HACD2,,MRPL28,,  
24 HADHB,,MRPL43,,  
25 HAND2,,MRPL55,,  
26 HDAC2,,MRPS2,,  
27 HDAC8,,MRPS22,,  
28 HERC2,,MSH6,,  
29 HHIPL1,,MTFP1,,  
30 HM13,,MTRF1,,  
31 HMBS,,MTTP,,  
32 HMGCL,,MVD,,  
33 HNRNPH1,,MYL6B,,  
34 HOOK2,,NAF1,,  
35 HOOK3,,NAT9,,  
36 HOXC4,,NDUFA2,,  
37 HS3ST2,,NDUFAF5,,  
38 HSD17B2,,NDUFAF7,,  
39 ID2,,NDUFB9,,  
40 ID3,,NECAP1,,  
41 IDS,,NELFA,,  
42 IFRD2,,NFS1,,  
43 IFT140,,NHP2,,  
44 IFT20,,NOP16,,  
45 IGSF9,,NOP2,,  
46 IL18RAP,,NOP53,,  
47 ILK,,NUDT2,,  
48 ILKAP,,NUDT4,,  
49 IP6K2,,OSBPL2,,  
50 IPO11,,OTUD4,,  
51 IPP,,PAX6,,  
52 IQGAP1,,PCNX4,,  
53 IRAK1,,PDCD10,,  
54 IRF1,,PDP2,,  
55 IRX4,,PDZD3,,  
56 IRX6,,PES1,,  
57 ITGB4,,PGS1,,  
58 JMJD7,,PHOSPHO1,,

## Animal complexity and information flow

28

1 KCNC2,, PIGL,,  
2 KCND3,, PIGS,,  
3 KCNIP1,, PIN1,,  
4 KCNIP4,, PIP4K2C,,  
5 KCNK15,, PISD,,  
6 KCTD1,, PKMYT1,,  
7 KCTD15,, PLA2G15,,  
8 KCTD3,, PNPO,,  
9 KCTD8,, POLA2,,  
10 KCTD9,, POLH,,  
11 KIF5A,, POLR2D,,  
12 KIF5C,, POLR2G,,  
13 KIFAP3,, PPP2CB,,  
14 KLF6,, PPWD1,,  
15 KLHL10,, PRELID3A,,  
16 KLHL2,, PREPL,,  
17 KMT2E,, PRICKLE1,,  
18 KPNA1,, PRPF8,,  
19 KPNA2,, PSEN1,,  
20 KPNA6,, PSMC2,,  
21 KRI1,, PSMC5,,  
22 KTI12,, PSMD7,,  
23 LANCL1,, PSMG2,,  
24 LIG3,, PTRHD1,,  
25 LLGL2,, RAB10,,  
26 LMAN2L,, RAB27A,,  
27 LMBR1,, RAD51C,,  
28 LMNA,, RAD9A,,  
29 LOXHD1,, RANBP3,,  
30 MAEA,, RASSF8,,  
31 MAFK,, RBM15,,  
32 MAGOH,, RBP5,,  
33 MAGT1,, RCL1,,  
34 MAP3K5,, REEP2,,  
35 MAR7,, REGL,,  
36 MCCC2,, RFWD3,,  
37 MCRS1,, RHAG,,  
38 MDH1,, RHOH,,  
39 MEAF6,, RNASEH2B,,  
40 MED12L,, RNPS1,,  
41 MED16,, RPL10,,  
42 MED4,, RPLP0,,  
43 METTL15,, RUVBL1,,  
44 METTL2A,, SARAF,,  
45 MIER1,, SARS2,,  
46 MKS1,, SCPEP1,,  
47 MRO,, SCYL1,,  
48 MROH1,, SDF2,,  
49 MROH2A,, SDHD,,  
50 MROH7,, SERP1,,  
51 MROH7-TTC4,, SETD4,,  
52 MROH8,, SFXN2,,  
53 MROH9,, SH3BP4,,  
54 MRPL39,, SH3GL1,,  
55 MRPS18A,, SIK1,,  
56 MSX2,, SLC19A3,,  
57 MTERF3,, SLC25A46,,  
58 MTMR2,, SLC25A48,,

## Animal complexity and information flow

29

1 MTREX,, SLC30A8,,  
2 MXI1,, SLC35F5,,  
3 MYBPC1,, SLC46A1,,  
4 MYBPC3,, SLC52A2,,  
5 MYCBP2,, SLC6A1,,  
6 MYLK,, SLX1A,,  
7 MYOM2,, SLX1B,,  
8 MYOM3,, SMARCB1,,  
9 N6AMT1,, SMARCE1,,  
10 NAPB,, SMN2,,  
11 NAT10,, SNF8,,  
12 NEB,, SNRNP25,,  
13 NEK2,, SNRPF,,  
14 NEK7,, SNUPN,,  
15 NEK8,, SPATA20,,  
16 NETO2,, SPEF2,,  
17 NEUROG2,, SPG7,,  
18 NFIA,, SPRYD7,,  
19 NIP7,, SSR3,,  
20 NIPAL1,, SSU72,,  
21 NIPAL3,, STUB1,,  
22 NIT2,, STX16,,  
23 NKX3-1,, SUOX,,  
24 NME2,, SUPT4H1,,  
25 NME7,, SUPT6H,,  
26 NODAL,, SYS1,,  
27 NR4A1,, TACO1,,  
28 NR4A2,, TARBP1,,  
29 NR4A3,, TATDN1,,  
30 NT5C1B,, TBC1D2,,  
31 NUP43,, TBC1D32,,  
32 OLFM1,, TBCE,,  
33 OLFM3,, TBCE,,  
34 OSBPL1A,, TBCE,,  
35 OSCP1,, TBCE,,  
36 PANK2,, TBL1X,,  
37 PAQR9,, TCTN1,,  
38 PARVA,, TFIP11,,  
39 PARVB,, TLR2,,  
40 PBRM1,, TMEM138,,  
41 PCBD1,, TMEM14B,,  
42 PCBD2,, TMEM169,,  
43 PCMT1,, TMEM41A,,  
44 PDC,, TMEM67,,  
45 PDCL,, TMLHE,,  
46 PDCL3,, TPO,,  
47 PDK3,, TPT1,,  
48 PDS5A,, TRAPPC5,,  
49 PDS5B,, TRAPPC8,,  
50 PDZD11,, TROVE2,,  
51 PDZRN4,, TRPT1,,  
52 PELI3,, TSNAX-DISC1,,  
53 PEPD,, TUBB6,,  
54 PGAP1,, TVP23C,,  
55 PGM1,, TWNK,,  
56 PGM5,, TXNDC15,,  
57 PHF12,, UBA5,,  
58 PHGDH,, UBE3B,,

## Animal complexity and information flow

30

1 PIGO,,UBXN1,,  
2 PIP4K2A,,ULK3,,  
3 PIP4K2B,,UPRT,,  
4 PITPNA,,UTP15,,  
5 PITPNB,,UTP4,,  
6 PKD2,,VPS36,,  
7 PLPPR1,,VSNL1,,  
8 PLXNB2,,WARS,,  
9 PLXNC1,,WASHC4,,  
10 PMS1,,WDR55,,  
11 PNKP,,WDR74,,  
12 POLD1,,WEE1,,  
13 POLR1C,,WRB,,  
14 PORCN,,WWC2,,  
15 PPA2,,YIPF5,,  
16 PPAN,,YPEL5,,  
17 PPAN-P2RY11,,ZC2HC1C,,  
18 PPFIA1,,ZCCHC10,,  
19 PPP1R21,,ZNF830,,  
20 PPP1R8,,,,  
21 PPP2R2B,,,,  
22 PPP2R2C,,,,  
23 PPP2R2D,,,,  
24 PRMT1,,,,  
25 PRPF19,,,,  
26 PSME1,,,,  
27 PSME3,,,,  
28 QTRT2,,,,  
29 RAB1A,,,,  
30 RAB6A,,,,  
31 RAB9B,,,,  
32 RABGGTB,,,,  
33 RAD1,,,,  
34 RAD54L2,,,,  
35 RAE1,,,,  
36 RAP1GDS1,,,,  
37 RASGRP1,,,,  
38 RB1,,,,  
39 RBL2,,,,  
40 RBM12,,,,  
41 RBM28,,,,  
42 RBM34,,,,  
43 RCAN1,,,,  
44 RCAN3,,,,  
45 RETSAT,,,,  
46 REV3L,,,,  
47 RFC5,,,,  
48 RHD,,,,  
49 RMND5A,,,,  
50 RNF115,,,,  
51 RNF126,,,,  
52 RNF157,,,,  
53 RNF220,,,,  
54 RPL22L1,,,,  
55 RPL4,,,,  
56 RPS25,,,,  
57 RPS6KB2,,,,  
58 RRAGC,,,,

## Animal complexity and information flow

31

1 RRM2,,,,,  
2 RTRAF,,,,,  
3 SALL2,,,,,  
4 SAT1,,,,,  
5 SATL1,,,,,  
6 SBF2,,,,,  
7 SCAF4,,,,,  
8 SCMH1,,,,,  
9 SCR2,,,,,  
10 SCR3,,,,,  
11 SDR42E2,,,,,  
12 SEC11A,,,,,  
13 SEC11C,,,,,  
14 SECISBP2,,,,,  
15 SENP3,,,,,  
16 SENP5,,,,,  
17 SEPT6,,,,,  
18 SEPT7,,,,,  
19 SESN1,,,,,  
20 SESN3,,,,,  
21 SETD3,,,,,  
22 SF3A1,,,,,  
23 SF3A2,,,,,  
24 SF3B5,,,,,  
25 SFT2D1,,,,,  
26 SFT2D2,,,,,  
27 SIGIRR,,,,,  
28 SIRT6,,,,,  
29 SIX1,,,,,  
30 SLBP,,,,,  
31 SLC10A3,,,,,  
32 SLC10A6,,,,,  
33 SLC19A1,,,,,  
34 SLC25A28,,,,,  
35 SLC35A1,,,,,  
36 SLC38A7,,,,,  
37 SLC7A6,,,,,  
38 SLCO4A1,,,,,  
39 SMAD3,,,,,  
40 SMARCD2,,,,,  
41 SMARCE1,,,,,  
42 SNRNP200,,,,,  
43 SNRNP40,,,,,  
44 SNRPA,,,,,  
45 SNRPB,,,,,  
46 SNRPC,,,,,  
47 SNRPE,,,,,  
48 SNX1,,,,,  
49 SNX10,,,,,  
50 SNX12,,,,,  
51 SNX3,,,,,  
52 SORL1,,,,,  
53 SOS2,,,,,  
54 SP5,,,,,  
55 SPOUT1,,,,,  
56 SRP72,,,,,  
57 ST3GAL2,,,,,  
58 ST7,,,,,

## Animal complexity and information flow

32

1 STAG1,,,,,  
2 STK3,,,,,  
3 STK4,,,,,  
4 STMN2,,,,,  
5 STMN4,,,,,  
6 STXBP1,,,,,  
7 STXBP2,,,,,  
8 SUFU,,,,,  
9 SUMF1,,,,,  
10 SUMF2,,,,,  
11 TBC1D23,,,,,  
12 TBL1XR1,,,,,  
13 TBL1Y,,,,,  
14 TBP,,,,,  
15 TCEA1,,,,,  
16 TCF3,,,,,  
17 TCP1,,,,,  
18 TCP11X2,,,,,  
19 TECR,,,,,  
20 TEK,,,,,  
21 TERT,,,,,  
22 TEX10,,,,,  
23 TFAP2B,,,,,  
24 THOC3,,,,,  
25 THSD7A,,,,,  
26 TMC7,,,,,  
27 TMCC2,,,,,  
28 TMED10,,,,,  
29 TMEM106B,,,,,  
30 TMEM120B,,,,,  
31 TMEM131,,,,,  
32 TMEM161A,,,,,  
33 TMEM161B,,,,,  
34 TMEM167B,,,,,  
35 TMEM231,,,,,  
36 TMEM63B,,,,,  
37 TOPBP1,,,,,  
38 TPD52,,,,,  
39 TPD52L2,,,,,  
40 TRAF4,,,,,  
41 TRAPPC12,,,,,  
42 TRAPPC3L,,,,,  
43 TRAPPC6A,,,,,  
44 TRIM23,,,,,  
45 TRMT112,,,,,  
46 TRPC6,,,,,  
47 TRPM1,,,,,  
48 TRPM2,,,,,  
49 TRPM3,,,,,  
50 TRPM8,,,,,  
51 TSC2,,,,,  
52 TSEN2,,,,,  
53 TSFM,,,,,  
54 TSN,,,,,  
55 TSPAN17,,,,,  
56 TSPAN3,,,,,  
57 TSR1,,,,,  
58 TTC1,,,,,



## Animal complexity and information flow

33

1 TTC17,,,,,  
2 TTC39A,,,,,  
3 TTC39C,,,,,  
4 TTC7A,,,,,  
5 TTC7B,,,,,  
6 TTLL5,,,,,  
7 TTLL7,,,,,  
8 TTLL9,,,,,  
9 TUSC3,,,,,  
10 TUT7,,,,,  
11 TXLNB,,,,,  
12 U2SURP,,,,,  
13 UBE2A,,,,,  
14 UBE2B,,,,,  
15 UBE2F,,,,,  
16 UBE2L3,,,,,  
17 UBE2L5,,,,,  
18 UBE3A,,,,,  
19 UBE3C,,,,,  
20 UBN1,,,,,  
21 UGGT2,,,,,  
22 UHRF1BP1L,,,,,  
23 UNC45A,,,,,  
24 UNC5C,,,,,  
25 USP15,,,,,  
26 USP19,,,,,  
27 USP46,,,,,  
28 VPS11,,,,,  
29 VPS33B,,,,,  
30 VPS35L,,,,,  
31 VTI1A,,,,,  
32 WASHC3,,,,,  
33 WDR3,,,,,  
34 WDR61,,,,,  
35 WDR91,,,,,  
36 XAB2,,,,,  
37 XRCC6,,,,,  
38 ZC2HC1A,,,,,  
39 ZC3H14,,,,,  
40 ZCCHC24,,,,,  
41 ZCCHC4,,,,,  
42 ZDHHC17,,,,,  
43 ZEB1,,,,,  
44 ZFAND2A,,,,,  
45 ZFAT,,,,,  
46 ZMYND11,,,,,  
47 ZNF687,,,,,  
48 ZSWIM8,,,,,  
49 ZXDA,,,,,  
50 ZXDB,,,,,  
51

1 **S4**  
2 ,,,,,,Gene summary,,  
3 GO-term Biological Process,N, Enrich,P-value,,,,,  
4 ethanol oxidation (GO:0006069),8,24.3,2.03E-04,,,GO-terms,total,genes  
5 transcription-coupled nucleotide-excision repair  
6 (GO:0006283),12,6.0,2.27E-02,,,5681 6283 6397,2,PRPF19  
7 endoplasmic reticulum to Golgi vesicle-mediated transport  
8 (GO:0006888),21,3.7,8.55E-03,,,,,XAB2  
9 Golgi vesicle transport (GO:0048193),32,3.2,2.86E-04,,,4022 6069,7,ADH5  
10 mRNA processing (GO:0006397),32,2.5,4.66E-02,,,,,ADH4  
11 heart development (GO:0007507),34,2.4,4.53E-02,,,,,ADH1A  
12 mRNA metabolic process (GO:0016071),42,2.3,2.04E-02,,,,,ADH7  
13 cellular component morphogenesis (GO:0032989),49,2.3,2.71E-03,,,,,ADH1C  
14 RNA processing (GO:0006396),51,2.2,3.81E-03,,,,,ADH1B  
15 protein-containing complex subunit organization  
16 (GO:0043933),100,2.0,8.95E-07,,,,,ADH6  
17 chromosome organization (GO:0051276),56,2.0,2.14E-02,,,5681  
18 6397,17,SNRNP200  
19 protein transport (GO:0015031),81,2.0,1.26E-04,,,,,MAGOH  
20 protein-containing complex assembly (GO:0065003),83,2.0,1.31E-  
21 04,,,,,RBM28  
22 ,,,,,,SNRPE  
23 ,,,,,,SNRNP40  
24 GO-term Molecular Function,N,Enrich ,P-value,,,,,PPP1R8  
25 alcohol dehydrogenase (NAD) activity (GO:0004022),7,28.4,2.40E-  
26 04,,,,,HNRNPH1  
27 transcription factor binding (GO:0008134),40,2.2,2.27E-02,,,,,CWC27  
28 ,,,,,,DHX8  
29 ,,,,,,SF3A1  
30 GO-term Cellular Compartment,N,Enrich,P-value,,,,,CDC40  
31 catalytic step 2 spliceosome (GO:0071013),14,5.9,6.88E-04,,,,,SNRPB  
32 spliceosomal complex (GO:0005681),19,3.8,2.69E-03,,,,,SF3B5  
33 actin cytoskeleton (GO:0015629),34,2.5,4.35E-03,,,,,GPATCH1  
34 catalytic complex (GO:1902494),86,2.3,9.45E-09,,,,,SF3A2  
35 transferase complex (GO:1990234),46,2.1,6.94E-03,,,,,SNRPA  
36 chromosomal part (GO:0044427),51,2.1,3.93E-03,,,,,SNRPC  
37 chromosome (GO:0005694),57,2.0,2.13E-03,,,15629 48193,2,CAPZA2  
38 ribonucleoprotein complex (GO:1990904),48,2.0,1.22E-02,,,,,CAPZA1  
39 ,,,,,,15629 6397,1,DHX9  
40 ,,,,,,6283 6397,3,CDK7  
41 ,,,,,,ERCC2  
42 ,,,,,,CCNH  
43 ,,,,,,15629,31,IQGAP1  
44 ,,,,,,ARPC5  
45 ,,,,,,PKD2  
46 ,,,,,,LLGL2  
47 ,,,,,,CIB2  
48 ,,,,,,KLHL2  
49 ,,,,,,ILK  
50 ,,,,,,TEK  
51 ,,,,,,PARVA  
52 ,,,,,,CLIC5  
53 ,,,,,,CLIC4  
54 ,,,,,,MYBPC3  
55 ,,,,,,ADAM8  
56 ,,,,,,NEB  
57 ,,,,,,PGM5  
58 ,,,,,,PARVB

## Animal complexity and information flow

35

1       , VPS11  
2       , MYBPC1  
3       , TTC17  
4       , IPP  
5       , TOPBP1  
6       , COBL  
7       , CTTNBP2  
8       , GABARAP  
9       , MAEA  
10      , MYLK  
11      , MYOM3  
12      , PGM1  
13      , TMEM63B  
14      , SEPT7  
15      , MYOM2  
16      , 6069, 1, ACSS2  
17      , 6283, 7, RFC5  
18      , CUL4B  
19      , GPS1  
20      , TCEA1  
21      , LIG3  
22      , COPS7A  
23      , POLD1  
24      , 48193, 29, ERGIC1  
25      , LMAN2L  
26      , DOPEY1  
27      , COPA  
28      , GRIA1  
29      , PITPNB  
30      , AP2A1  
31      , RAB1A  
32      , KIF5A  
33      , TRAPPC3L  
34      , ARFGAP1  
35      , CNIH1  
36      , VTI1A  
37      , CNIH4  
38      , COPZ1  
39      , TRIM23  
40      , GGA3  
41      , BET1  
42      , RAB6A  
43      , PGAP1  
44      , TMED10  
45      , BCAP29  
46      , SNX1  
47      , TRAPPC12  
48      , SORL1  
49      , BET1L  
50      , EXOC6  
51      , KIFAP3  
52      , TRAPPC6A  
53      , 6397, 9, FAM172A  
54      , SLBP  
55      , CLASRP  
56      , THOC3  
57      , U2SURP  
58      , APP

## Animal complexity and information flow

36

1    , , , , , , , , CPSF4  
2    , , , , , , , , AHCYL1  
3    , , , , , , , , TSEN2  
4

|    |                         |
|----|-------------------------|
| 1  | <b>S5</b>               |
| 2  | CompX ExAC overlap list |
| 3  | 159 genes               |
| 4  | ABI2                    |
| 5  | AHCYL1                  |
| 6  | ALAS2                   |
| 7  | ANKRD50                 |
| 8  | AP1B1                   |
| 9  | AP2A1                   |
| 10 | AP2S1                   |
| 11 | ARID2                   |
| 12 | ARIH2                   |
| 13 | ARMC8                   |
| 14 | ARNT                    |
| 15 | ATG2A                   |
| 16 | ATXN7L3                 |
| 17 | BACE1                   |
| 18 | BNC2                    |
| 19 | CAPZA1                  |
| 20 | CAPZA2                  |
| 21 | CBX8                    |
| 22 | CCNC                    |
| 23 | CCZ1                    |
| 24 | CDC40                   |
| 25 | CDK1                    |
| 26 | CDK19                   |
| 27 | CDK5                    |
| 28 | CHD5                    |
| 29 | CLASRP                  |
| 30 | CNOT7                   |
| 31 | COBL                    |
| 32 | COL12A1                 |
| 33 | COL6A1                  |
| 34 | COPA                    |
| 35 | COPS7A                  |
| 36 | CUL4B                   |
| 37 | DEPDC5                  |
| 38 | DERL2                   |
| 39 | DHX8                    |
| 40 | DHX9                    |
| 41 | DLST                    |
| 42 | DOPEY1                  |
| 43 | DTX3                    |
| 44 | ERLIN1                  |
| 45 | EYA3                    |
| 46 | FAM49B                  |
| 47 | FCF1                    |
| 48 | FOXP1                   |
| 49 | GNL1                    |
| 50 | GPS1                    |
| 51 | GRIA1                   |
| 52 | GRIA4                   |
| 53 | GRIK2                   |
| 54 | HDAC2                   |
| 55 | HDAC8                   |
| 56 | HERC2                   |
| 57 | HMBS                    |
| 58 | HNRNP1                  |

## Animal complexity and information flow

38

- 1 HOOK3
- 2 IDS
- 3 ILKAP
- 4 IP6K2
- 5 IPO11
- 6 IQGAP1
- 7 IRAK1
- 8 KCNIP4
- 9 KCTD1
- 10 KCTD3
- 11 KIF5A
- 12 KIF5C
- 13 KLF6
- 14 KLHL10
- 15 KLHL2
- 16 KMT2E
- 17 KPNA1
- 18 KPNA6
- 19 LMNA
- 20 MAP3K5
- 21 MDH1
- 22 MED12L
- 23 MIER1
- 24 MYCBP2
- 25 NAPB
- 26 NFIA
- 27 NODAL
- 28 NR4A1
- 29 NR4A2
- 30 OLFM1
- 31 PBRM1
- 32 PDS5A
- 33 PDS5B
- 34 PGM5
- 35 PHF12
- 36 PIP4K2B
- 37 PITPNA
- 38 PITPNB
- 39 PKD2
- 40 PLXNB2
- 41 PLXNC1
- 42 PORCN
- 43 PPFIA1
- 44 PPP1R8
- 45 PPP2R2B
- 46 PRMT1
- 47 PRPF19
- 48 PSME3
- 49 RAD54L2
- 50 RAE1
- 51 RB1
- 52 RBL2
- 53 REV3L
- 54 RMND5A
- 55 RNF220
- 56 RPL4
- 57 RRM2
- 58 SCAF4

## Animal complexity and information flow

39

- 1 SENP3
- 2 SENP5
- 3 SESN3
- 4 SF3A1
- 5 SIX1
- 6 SMARCD2
- 7 SMARCE1
- 8 SNRNP200
- 9 SNX1
- 10 SOS2
- 11 ST3GAL2
- 12 ST7
- 13 STAG1
- 14 STMN2
- 15 STXBP1
- 16 SUFU
- 17 TBL1XR1
- 18 TCP1
- 19 TEK
- 20 TEX10
- 21 TFAP2B
- 22 THSD7A
- 23 TMEM131
- 24 TMEM63B
- 25 TOPBP1
- 26 TSC2
- 27 TSN
- 28 TTC17
- 29 TTC7B
- 30 U2SURP
- 31 UBE2F
- 32 UBE3A
- 33 UBE3C
- 34 UBN1
- 35 UHRF1BP1L
- 36 USP15
- 37 USP19
- 38 USP46
- 39 XAB2
- 40 XRCC6
- 41 ZC3H14
- 42 ZDHHC17
- 43 ZEB1
- 44 ZMYND11
- 45 ZNF687
- 46 ZSWIM8
- 47

```
1 S6
2 ,,,,,,#GO term overlap data,,
3 GO biological process complete,N,Enrich,P-value,,,GO terms,Number,Genes
4 regulation of G1/S transition of mitotic cell cycle
5 (GO:2000045),9,8.02,2.69E-02,,,16032 16570 1902494 1990234 2000045
6 51276 6325 70647 9057,1,CDK1
7 histone modification (GO:0016570),14,4.8,1.82E-02,,,16032 1902494
8 1990234 2000045 3712 51276 6325 785 8134,1,RB1
9 chromatin organization (GO:0006325),22,4.03,3.85E-04,,,16570 1902494
10 1990234 2000045 51276 6325 70647 9057,1,CUL4B
11 viral process (GO:0016032),18,3.71,2.16E-02,,,16570 1902494 1990234
12 3712 51276 6325 70647,1,ATXN7L3
13 chromosome organization (GO:0051276),30,3.68,7.56E-06,,,16570 1902494
14 1990234 51276 6325 70647 785,1,CBX8
15 protein modification by small protein conjugation or removal
16 (GO:0070647),24,3.27,3.84E-03,,,16570 1902494 1990234 51276 6325 785
17 8134,1,HDAC2
18 macromolecule catabolic process (GO:0009057),24,3.01,1.57E-02,,,16570
19 1902494 1990234 2000045 51276 6325,1,PRMT1
20 protein localization (GO:0008104),40,2.4,1.56E-03,,,16570 1902494 3712
21 51276 6325 9057,1,TBL1XR1
22 protein-containing complex subunit organization
23 (GO:0043933),34,2.38,2.03E-02,,,16570 1902494 1990234 51276 6325
24 9057,1,CDK5
25 macromolecule localization (GO:0033036),42,2.18,1.05E-02,,,1902494 3712
26 51276 6325 785 8134,1,SMARCE1
27 nucleic acid metabolic process (GO:0090304),39,2.14,4.19E-02,,,16032
28 1902494 3712 51276 785 8134,1,DHX9
29 cellular protein modification process (GO:0006464),49,2.03,7.05E-
30 03,,,16570 2000045 51276 6325 785,1,KMT2E
31 ,,,,,,16570 51276 6325 70647 9057,1,USP15
32 ,,,,,,16570 3712 51276 6325 8134,1,MIER1
33 GO molecular function complete,N,Enrich,P-value,,,16570 1902494 51276
34 6325 8134,1,HDAC8
35 transcription coregulator activity (GO:0003712),16,3.58,3.98E-
36 02,,,16570 1902494 51276 6325 785,1,CHD5
37 transcription factor binding (GO:0008134),18,3.43,1.98E-02,,,2000045
38 51276 6325 785 8134,1,RBL2
39 ,,,,,,1902494 3712 51276 6325 785,1,SMARCD2
40 ,,,,,,16032 3712 51276 6325,1,ZMYND11
41 GO cellular component complete,N, Enrich,P-value,,,1902494 51276 6325
42 785,1,PBRM1
43 catalytic step 2 spliceosome (GO:0071013),7,10.18,1.32E-02,,,16032
44 1902494 1990234 51276,1,RAE1
45 chromatin (GO:0000785),16,3.8,9.83E-03,,,2000045 3712 8134 9057,1,CNOT7
46 catalytic complex (GO:1902494),39,3.54,6.72E-09,,,16032 1902494 70647
47 9057,1,UBE3A
48 transferase complex (GO:1990234),20,3.19,8.67E-03,,,1902494 70647 71013
49 9057,1,PRPF19
50 nucleoplasm part (GO:0044451),26,2.94,1.40E-03,,,1902494 1990234 70647
51 9057,2,RMND5A
52 chromosome (GO:0005694),22,2.69,3.96E-02,,,,,ARIH2
53 nucleoplasm (GO:0005654),73,2.65,2.72E-13,,,1902494 3712 785
54 8134,1,PHF12
55 nuclear lumen (GO:0031981),79,2.44,9.19E-13,,,16570 51276 6325,1,EYA3
56 protein-containing complex (GO:0032991),98,2.3,2.53E-16,,,16032 51276
57 6325,1,UBN1
58 nuclear part (GO:0044428),79,2.22,1.83E-10,,,16032 51276 70647,1,COPS7A
```



## Animal complexity and information flow

41

1 organelle lumen (GO:0043233),87,2.1,7.51E-11,, ,1902494 2000045  
2 70647,1,PSME3  
3 intracellular organelle lumen (GO:0070013),87,2.1,7.51E-11,, ,16032  
4 1902494 1990234,1,MAP3K5  
5 membrane-enclosed lumen (GO:0031974),87,2.1,7.51E-11,, ,1902494 70647  
6 9057,1,UBE3C  
7 ,,,,,,1902494 1990234 70647,2,KLHL2  
8 ,,,,,, ,SENP3  
9 ,,,,,,1902494 1990234 9057,1,ARMC8  
10 ,,,,,,51276 6325,1,ARID2  
11 ,,,,,,16032 51276,1,XRCC6  
12 ,,,,,,51276 70647,1,GPS1  
13 ,,,,,,51276 785,3,STAG1  
14 ,,,,,, ,PDS5B  
15 ,,,,,, ,PDS5A  
16 ,,,,,,16032 9057,3,KPNA1  
17 ,,,,,, ,AP2A1  
18 ,,,,,, ,AP2S1  
19 ,,,,,,16032 8134,1,NFIA  
20 ,,,,,,70647 9057,3,HERC2  
21 ,,,,,, ,USP46  
22 ,,,,,, ,USP19  
23 ,,,,,,3712 8134,4,ARNT  
24 ,,,,,, ,SUFU  
25 ,,,,,, ,ZEB1  
26 ,,,,,, ,KCTD1  
27 ,,,,,,1902494 71013,6,SNRNP200  
28 ,,,,,, ,HNRNPH1  
29 ,,,,,, ,XAB2  
30 ,,,,,, ,DHX8  
31 ,,,,,, ,SF3A1  
32 ,,,,,, ,CDC40  
33 ,,,,,,1902494 1990234,5,REV3L  
34 ,,,,,, ,TEX10  
35 ,,,,,, ,ZSWIM8  
36 ,,,,,, ,DLST  
37 ,,,,,, ,DEPDC5  
38 ,,,,,,2000045,1,PKD2  
39 ,,,,,,16032,4,IRAK1  
40 ,,,,,, ,AP1B1  
41 ,,,,,, ,TSC2  
42 ,,,,,, ,ABI2  
43 ,,,,,,70647,6,MYCBP2  
44 ,,,,,, ,UBE2F  
45 ,,,,,, ,RNF220  
46 ,,,,,, ,KLHL10  
47 ,,,,,, ,DTX3  
48 ,,,,,, ,SENP5  
49 ,,,,,,9057,6,BACE1  
50 ,,,,,, ,IDS  
51 ,,,,,, ,PPP1R8  
52 ,,,,,, ,DERL2  
53 ,,,,,, ,ERLIN1  
54 ,,,,,, ,RPL4  
55 ,,,,,,3712,2,TFAP2B  
56 ,,,,,, ,MED12L  
57 ,,,,,,8134,4,FOXP1  
58 ,,,,,, ,SIX1

## Animal complexity and information flow

42

1    , , , , , , , NR4A2  
2    , , , , , , , NR4A1  
3    , , , , , 785, 2, SOS2  
4    , , , , , , , TCP1  
5    , , , , , 1902494, 1, PPP2R2B  
6

1 **S7**  
2 ,,,ELEMENT,,,,,,,,,,,,GO-TERM,,,,,,,,,,,,,  
3 Gene,Remod,Mediator,ChromMod,Splicing,RNAexport,Translation,Transport,U  
4 biq-related,Cell cycle,DNA  
5 repair,STRING,2000045,16570,6325,16032,51276,70647,9057,3712,8134,71013  
6 ,785,1902494,1990234,,Gene card functions,Reference DOI:  
7 ARID2,X,,,,,,,,,A,,,X,X,,,,,,,,,,,,SWI/SNF chromatin remodeling  
8 complex,10.1074/jbc.M111.279968.  
9 CBX8,X,,X,,,,,,,,,A,,X,X,,X,X,,,,,,,,,X,X,,,"Polycomb group (PcG)  
10 multiprotein PRC1-like complex, chromatin remodeling and modification  
11 of histones, monoubiquitination of histone H2A 'Lys-  
12 119'," ,10.1093/nar/gky1290  
13 PBRM1,X,,,,,,,,,A,,,X,X,,,,,X,X,,,SWI/SNF chromatin remodeling  
14 complex/numerous DNA repair mechanisms /promoting genome stability  
15 ,10.1021/acschembio.7b00541 /10.1016/j.celrep.2014.02.012.  
16 SMARCD2,X,,,,,,,,,A,,,X,X,,,X,,,X,X,,,SWI/SNF chromatin remodeling  
17 complexes,10.1074/jbc.R111.309302  
18 SMARCE1,X,,,,,,,,,A,,,X,X,,,X,X,,X,X,,,SWI/SNF chromatin remodeling  
19 complexes,10.1074/jbc.R111.309302  
20 XRCC6,X,,,,,,,,,X,A,,,,X,X,,,,,,,,,,,,Single-stranded DNA-dependent ATP-  
21 dependent helicase / Involved in DNA non-homologous end joining (NHEJ)  
22 / DNA repair,10.1016/j.mrrev.2014.06.002.  
23 ZSWIM8,X,,,,,,,,,A,,,,,,,,,,,,X,X,,Zinc Finger SWIM-Type Containing 8  
24 / uncertain function,ND  
25 CCNC,,,X,,,,,,,,,A,,,,,,,,,,,,string only,Component of the Mediator  
26 complex/The level of mRNAs for this gene peaks in the G1 phase of the  
27 cell cycle,10.3390/biology8010003.  
28 CDK19,,,X,,,,,,,,,A,,,,,,,,,,,,string only,one of the components of  
29 the Mediator co-activator complex,10.3389/fcell.2018.00171  
30 MED12L,,,X,,,,,,,,,A,,,,,,,,,X,,,,,,,,,component of the Mediator  
31 complex,10.1038/nrm.2017.115.  
32 CHD5,,,X,,,,,,,,,A,,X,X,,X,,,,,X,X,,,Chromatin-remodeling protein /  
33 chromodomain helicase DNA-binding protein / DNA  
34 repair,10.1016/j.mrfmmm.2013.07.008.  
35 HDAC2,,,X,,,,,,,,,A,,X,X,,X,,,,,X,X,X,X,,deacetylation of lysine  
36 residues on the N-terminal part of the core histones ,  
37 10.1387/ijdb.150071tz.  
38 HDAC8,,,X,,,,,,,,,A,,X,X,,X,,,,,X,X,X,,deacetylation of lysine residues  
39 on the N-terminal part of the core histones / a major 'epigenetic  
40 player' ,10.1016/j.tips.2015.04.013.  
41 RB1,,,X,,,,,,,,,A,X,X,X,X,X,,X,X,X,X,X,,entry into cell division/ acts  
42 as a tumor suppressor/Directly involved in heterochromatin formation  
43 /Recruits and targets histone methyltransferases / recruiting a histone  
44 deacetylase (HDAC) complex,10.1016/j.jaut.2016.05.012  
45 RBL2,,,X,,,,,,,,,A,X,X,X,X,X,,X,X,,,Key regulator of entry into cell  
46 division/Directly involved in heterochromatin formation /Recruits and  
47 targets histone methyltransferases ,PMID: 12225593  
48 TBL1XR1,,,X,,,,,X,,,A,,X,X,,X,X,X,,,,,X,,,nuclear receptor corepressor  
49 (N-CoR) and histone deacetylase 3 (HDAC 3) complexes / recruitment of  
50 the ubiquitin/19S proteasome complex,PMC4446378  
51 UBN1,,,X,,,,,,,,,A,,,X,X,X,,,,,,,,,,,,Acts as a novel regulator of  
52 senescence / HIRA complex/ Adds histone H3.3to nucleosomes -  
53 remodelling replacement,10.1186/s12915-018-0573-9.  
54 PHF12,,,X,,,,,,,,,A,,,,,,,,,X,X,X,X,,,recruitment of functional SIN3A  
55 complexes / histone deacetylase (HDAC),10.1128/MCB.21.13.4110-4118.2001  
56 CDC40,,,,,X,,,,,X,A,,,,,,,,,,,,X,X,,,Associates with the  
57 spliceosome /second step of pre-mRNA splicing/ control cell cycle

1 through splicing of intron-containing pre-mRNAs that encode proteins  
2 important for cell cycle progression.,10.1007/s00294-006-0113-y  
3 DHX8,,,,X,X,,,,,A,,,,,,X,,X,,,Involved in pre-mRNA splicing as  
4 component of the spliceosome/ Facilitates nuclear export of spliced  
5 mRNA by releasing the RNA from the spliceosome  
6 ,10.1016/j.cell.2016.01.025.  
7 HNRNPH1,,,,X,,,,,A,,,,,,X,,X,,,Mediates pre-mRNA alternative  
8 splicing regulation.,10.1261/rna.036715.112.  
9 PRPF19,,,,X,,,X,,A,,,,,X,X,,,X,X,,,Ubiquitin-protein ligase / part  
10 of the spliceosome / DNA repair,10.1101/gad.1925010  
11 SF3A1,,,,X,,,,,A,,,,,,X,,X,,,splicing  
12 factor,10.1101/gad.248625.114.  
13 SNRNP200,,,,X,,,,,A,,,,,,X,,X,,,RNA helicase that plays an  
14 essential role in pre-mRNA splicing ,10.1042/BST0381105.  
15 XAB2,,,,X,X,,,,X,A,,,,,,X,,X,,, "Involved in pre-mRNA splicing as  
16 component of the spliceosome / transcription-coupled repair /plays  
17 critical role in processes including transcription, transcription-  
18 coupled DNA repair, pre-mRNA splicing, homologous recombination and  
19 mRNA export./mitotic cell cycle regulation",10.1074/jbc.M004936200 /  
20 10.1038/cddis.2016.313.  
21 DHX9,,,,X,,X,,,X,A,,,,X,X,,,X,X,,,X,X,,, "DNA replication,  
22 transcriptional activation, post-transcriptional RNA regulation, mRNA  
23 translation and RNA-mediated gene silencing/Plays a role in DNA  
24 replication at origins of replication and cell cycle progression  
25 /promotes pre-mRNA alternative/ splicing activities/ a role in mRNA  
26 translation",10.18632/oncotarget.8446.  
27 U2SURP,,,,X,,,,,A,,,,,,String only,link the activity of the  
28 spliceosome to the regulation of downstream RNA-binding  
29 proteins,10.1016/j.celrep.2018.09.041.  
30 KIF5C,,,,X,,X,,,A,,,,,,String only,transport of cargo within  
31 the central nervous system. Vesicle associated,10.1007/s00018-009-0253-  
32 6.  
33 RAE1,,,,X,,,,,A,,,,,X,X,,,,,X,X,,,involved in RNA export /  
34 nucleocytoplasmic transport,10.1016/j.cell.2005.04.003  
35 FCF1,,,,X,,,,,A,,,,,,String only,pre-rRNA processing and 40S  
36 ribosomal subunit assembly.,10.1016/j.bbrc.2006.05.140  
37 RPL4,,,,X,,,,,A,,,,,X,,,,,a ribosomal protein that is a  
38 component of the 60S subunit,  
39 SENP3,,,,X,,,,,A,,,,,X,,,,,X,X,,,Protease that releases SUMO2 and  
40 SUMO3 monomers from sumoylated substrates, 10.1002/iub.113.  
41 TEX10,,,,X,,,,,A,,,,,,X,X,,,component of the Five Friends of  
42 Methylated CHTOP (5FMC) complex,10.1074/mcp.M112.017194  
43 AP1B1,,,,X,,,A,,,,,X,,,,,,at the cytoplasmic face of coated  
44 vesicles located at the Golgi complex/role in protein sorting in the  
45 late-Golgi/trans-Golgi network (TGN) and/or endosomes.  
46 ,10.1371/journal.pone.0060866.  
47 AP2A1,,,,X,,,A,,,,,X,,,X,,,,,,Adaptor protein complexes function  
48 in protein transport via transport vesicles in different membrane  
49 traffic pathways./nvolved in cargo selection and vesicle formation. /  
50 clathrin-dependent endocytosis /binds polyphosphoinositide-containing  
51 lipids,10.1111/cpr.12522.  
52 AP2S1,,,,X,,,A,,,,,X,,,X,,,,,,Adaptor protein complexes function  
53 in protein Transport via Transport vesicles in different membrane  
54 traffic pathways./ involved in cargo selection and vesicle  
55 formation,PMID: 7593184  
56 COPA,,,,X,,,A,,,,,,String only,"Coatomer complex / non-  
57 clathrin-coated vesicular coat proteins /mediate biosynthetic protein

1 transport from the ER, via the Golgi up to the trans Golgi  
2 network.",10.1038/ng.3279.  
3 KIF5A,,,,,,X,,,,A,,,,,,String only, Microtubule-dependent motor  
4 required for slow axonal transport of neurofilament proteins/  
5 Microtubule-dependent motor required for slow axonal transport of  
6 neurofilament proteins/ALS,10.1016/j.neuron.2012.10.012.  
7 SUFU,,,,,,X,,,,A,,,,,,X,X,,,,,,Negative regulator in the  
8 hedgehog/smoothed signaling pathway.,  
9 ARIH2,,,,,,X,,,,A,,,,,,X,X,,,,,,X,X,,E3 ubiquitin-protein ligase works  
10 ogether with cullin-5-RING ubiquitin ligase complex activity is  
11 activated upon binding to neddylated form of the ECS  
12 complex,10.1182/blood-2005-04-1450  
13 COPS7A,,,,,,X,,,,A,,,,,,X,X,X,,,,,,component of the COP9 signalosome  
14 complex regulates the activity of the ubiquitin conjugation pathway by  
15 mediating the deneddylation of the cullin subunits of SCF-type E3  
16 ligase complexes,PMID: 11861754  
17 CUL4B,,,,,,X,,,,A,X,X,X,,X,X,X,,,,,,X,X,,E3 ubiquitin ligase - may act  
18 as a scaffold protein,10.1016/j.gene.2015.08.064  
19 GPS1,,,,,,X,,,,A,,,,,,X,X,,,,,,component of the COP9 signalosome  
20 complex regulates the activity of the ubiquitin conjugation pathway by  
21 mediating the deneddylation of the cullin subunits of SCF-type E3  
22 ligase complexes,PMID: 11861754  
23 HERC2,,,,,,X,,,,A,,,,,,X,X,,,,,,E3 ubiquitin-protein ligase that  
24 regulates ubiquitin-dependent retention of repair proteins on damaged  
25 chromosomes,10.1158/0008-5472.  
26 KLHL10,,,,,,X,,,,A,,,,,,X,,,,,,May be a substrate-specific adapter  
27 of a CUL3-based E3 ubiquitin-protein ligase  
28 complex ,10.1095/biolreprod.105.045484  
29 KLHL2,,,,,,X,,,,A,,,,,,X,,,,,,X,X,,Component of a cullin-RING-based  
30 BCR (BTB-CUL3-RBX1) E3 ubiquitin-protein ligase complex / Actin  
31 binding,10.1016/j.bbrc.2013.06.104.  
32 MYCBP2,,,,,,X,,,,A,,,,,,X,,,,,,E3 ubiquitin-protein ligase / also  
33 acts as a guanosine exchange factor (GEF) for RAN,10.1038/s41586-018-  
34 0026-1  
35 PSME3,,,,,,X,,,,A,X,,,,,,X,,,,,,X,,, "proteasome regulator/ Facilitates  
36 the MDM2-p53/TP53 interaction which promotes ubiquitination- and MDM2-  
37 dependent proteasomal degradation of p53/TP53, limiting its  
38 accumulation ",10.1007/s10495-015-1149-6.  
39 RNF220,,,,,,X,,,,A,,,,,,X,,,,,,E3 ubiquitin-protein  
40 ligase,10.1128/MCB.00731-14.  
41 UBE2F,,,,,,X,,,,A,,,,,,X,,,,,,ubiquitin protein ligase activity /  
42 E2,10.1016/j.molcel.2009.01.011.  
43 UBE3A,,,,,,X,,,,A,,,,,,X,X,X,,,,,,X,,,E3 ubiquitin-protein ligase,doi:  
44 10.1146/annurev.biochem.78.081507.101607.  
45 UBE3C,,,,,,X,,,,A,,,,,,X,X,,,,,,X,,,E3 ubiquitin-protein ligase,doi:  
46 10.1146/annurev.biochem.78.081507.101607.  
47 IRAK1,,,,,,X,,,,A,,,,,,,"Serine/threonine-protein kinase  
48 Phosphorylates E3 ubiquitin ligases Pellino proteins/phosphorylates  
49 TIRAP to promote its ubiquitination and subsequent degradation.  
50 Phosphorylates the interferon regulatory factor 7 (IRF7) to induce its  
51 activation and translocation to the nucleus, When sumoylated,  
52 translocates to the nucleus and phosphorylates  
53 STAT3",10.1016/j.cellsig.2007.08.009  
54 CDK1,,,,,,X,,,,A,X,X,X,X,X,X,X,,,,,,X,X,,key role in the control of the  
55 eukaryotic cell cycle ,10.1007/s00294-018-00926-y  
56 CDK5,,,,,,X,,,,A,X,X,X,X,X,,,,,,X,X,,essential for neuronal cell cycle  
57 arrest and differentiation / atypical CDK/ neuronal actin cytoskeletal  
58 remodeling,10.1007/s12035-017-0525-3

1 PDS5A,,,,,,,,X,A,,,,,X,,,,,X,,,,,regulator of sister chromatid  
2 cohesion in mitosis / DNA repair,10.1002/bies.201600207  
3 PDS5B,,,,,,,,X,A,,,,,X,,,,,X,,,,,regulator of sister chromatid  
4 cohesion in mitosis / DNA repair,10.1002/bies.201600207  
5 STAG1,,,,,,,,X,A,,,,,X,,,,,X,,,,,"a component of cohesin / Cohesin is  
6 a multi-protein complex that tethers sister chromatids during mitosis  
7 and mediates DNA repair,"10.18632/oncotarget.16838.  
8  
9 ATXN7L3,,,X,,,,,X,,,,,X,X,,X,X,,X,,,,,X,X,,HAT histone acetylation (HAT)  
10 complex SAGA / de-ubiquitinase,10.1016/j.molcel.2007.12.011.  
11 EYA3,,,X,,,,,X,,,X,X,,X,,,,,,Tyrosine phosphatase /  
12 dephosphorylates 'Tyr-142' of histone H2AX /DNA repair  
13 /apoptosis,10.1038/nature07849.  
14 KMT2E,,,X,,,,,X,X,X,,X,,,,,X,,,,,Epigeneticwriter/ histone  
15 methyltransferase/ Chromatin interaction is mediated via the binding to  
16 tri-methylated histone H3 at 'Lys-4' (H3K4me3)  
17 ,10.1371/journal.pone.0077020.  
18 MIER1,,,X,,,,,X,X,,X,,X,X,,,,,Transcriptional repressor /  
19 recruitment of HDAC1 a histone  
20 deacetylase,10.1371/journal.pone.0169338.  
21 PRMT1,,,X,,,,,X,X,X,,X,,,,,X,X,,Arginine  
22 methyltransferase/monomethylation and asymmetric dimethylation of  
23 histone H4,10.1111/j.1742-4658.2006.05399.x  
24 ZMYND11,,,X,,,,,X,X,X,,X,,,,,Chromatin reader that  
25 specifically recognizes and binds histone H3.3 trimethylated at 'Lys-  
26 36' / unconventional transcription co-repressor by modulating RNA  
27 polymerase II,doi: 10.1038/nature13045.  
28 DLST,,,X,,,,,X,X,,X,X,,In mitochondria/ also lysine  
29 succinylation of histones:,10.1038/nature25003.  
30 PPP2R2B,,,X,X,,,,,X,,,,,phosphatase 2 regulatory subunit B  
31 family / function uncertain,  
32 REV3L,,,X,,,,,X,,,,,X,X,,Catalytic subunit of the DNA  
33 polymerase zeta complex/ DNA repair via translesion  
34 synthesis,10.3390/ijms20010100.  
35 CNOT7,,,,,X,,,,,X,,,,,X,X,X,,,,,one of the major cellular mRNA  
36 deadenylases / bulk mRNA degradation,10.1042/BST20120074.  
37 BACE1,,,,,X,,,,,X,,,,,proteolytic processing of the amyloid  
38 precursor protein,10.2174/156720508783954758  
39 DERL2,,,,,X,X,,,,,X,,,,,endoplasmic reticulum-associated  
40 degradation (ERAD),10.1083/jcb.200507057  
41 ERLIN1,,,,,X,X,,,,,X,,,,,"mediates degradation of inositol  
42 1,4,5-trisphosphate receptors in the endoplasmic reticulum./he  
43 endoplasmic reticulum-associated degradation  
44 (ERAD)",10.1074/jbc.RA118.004547.  
45 KPNA1,,,,,X,,,,,X,,,X,,,,,involved in nuclear protein  
46 import,10.1083/jcb.201702092.  
47 PPP1R8,,,,,X,,,,,X,,,,,Inhibitor subunit of the major  
48 nuclear protein phosphatase-1 / nvolved in pre-mRNA splicing /  
49 chromatin modification,10.1074/jbc.M805468200. / 10.1074/jbc.M302273200  
50 USP15,,,,,X,X,,,,,X,X,,X,X,X,,,,,Deubiquitinating enzyme/  
51 Hydrolase that removes conjugated ubiquitin from target proteins /  
52 associates with the COP9 signalosome / Regulates ER-Golgi vesicle  
53 trafficking ,10.1016/j.cell.2016.05.078.  
54 ABI2,,,,,X,,,,,X,,,,,Regulator of actin cytoskeleton  
55 dynamics /controls dendritic spine morphogenesis/endocytic trafficking/  
56 WAVE complex,10.3892/ijmm.9.6.591  
57 PKD2,,,,,X,,,,,X,,,,,"a multi-pass membrane protein that  
58 functions as a calcium permeable cation channel,"10.1113/JP270933.

## Animal complexity and information flow

47

1 USP19,,,,,,,,X,,,,,,,,X,X,,,,,,,,Deubiquitinating enzyme/ ER  
2 ERAD,<https://doi.org/10.3390/ijms17111829>  
3 USP46,,,,,,,,X,,,,,,,,X,X,,,,,,,,Deubiquitinating  
4 enzyme/,10.1074/jbc.M808430200  
5 ARNT,,,,,,,,X,,,,,,,,X,X,,,,,,,,Component of the CTLH E3 ubiquitin-  
6 protein ligase complex ,10.1371/journal.pone.0075217  
7 DTX3,,,,,,,,X,,,,,,,,X,,,,,,,,E3 ubiquitin  
8 ligase ,10.1074/jbc.M301157200  
9 KCTD1,,,,,,,,X,,,,,,,,X,X,,,,,,,,Transcriptional repression through  
10 AP-2 / Interacts with Cullin E3-ubiquitin ligases,10.1042/BCJ20170527  
11 ARMC8,,,,,,,,,,,,,,,,X,,,,,X,X,,mitochondrially located enzyme / heme  
12 biosynthetic pathway,10.1182/asheducation-2012.1.19.  
13 DEPDC5,,,,,,,,,,,,,,,,X,X,,component of the GATOR1 complex / an  
14 inhibitor of the amino acid-sensing branch of the TORC1  
15 pathway,10.1016/j.nbd.2016.02.010.  
16 FOXP1,,,,,,,,,,,,,,,,X,,,,,forkhead box (FOX) transcription  
17 factor,10.1101/gad.1637108.  
18 IDS,,,,,,,,,,,,,,,,X,,,,,,,,member of the sulfatase family of  
19 proteins / lysosomal degradation of heparan sulfate,  
20 MAP3K5,,,,,,,,,,,,,,,,X,,,,,,,,X,X,,essential component of the MAP  
21 kinase signal transduction pathway,  
22 NFIA,,,,,,,,,,,,,,,,X,,,X,,,,,,,,,a transcription factor / possible  
23 epigenetic role,  
24 NR4A1,,,,,,,,,,,,,,,,X,,,,,transcription factor of of the steroid-  
25 thyroid hormone-retinoid receptor superfamily,  
26 NR4A2,,,,,,,,,,,,,,,,X,,,,,transcription factor of the steroid-  
27 thyroid hormone-retinoid receptor superfamily,  
28 RMND5A,,,,,,,,,,,,,,,,X,X,,,X,X,X,,Core component of the CTLH E3  
29 ubiquitin-protein ligase complex / relates to cell  
30 cycle,10.7554/eLife.35528  
31 SENP5,,,,,,,,,,,,,,,,X,,,,,,,,Protease that releases SUMO2 and SUMO3  
32 monomers from sumoylated substrates, 10.1002/iub.113.  
33 SIX1,,,,,,,,,,,,,,,,X,,,,,,,,Transcription factor ,  
34 SOS2,,,,,,,,,,,,,,,,X,,,,SOS Ras/Rho Guanine Nucleotide Exchange  
35 Factor 2 / interaction of Sos1 with the COP9  
36 signalosome,10.1128/MCB.00049-18. / 10.1038/s41389-018-0111-1.  
37 TCP1,,,,,,,,,,,,,,,,X,,,,As part of the TRiC complex may play a  
38 role in the assembly of BBSome,  
39 TFAP2B,,,,,,,,,,,,,,,,X,,,,,Sequence-specific DNA-binding protein  
40 transcription factor,  
41 TSC2,,,,,,,,,,,,,,,,X,,,,,,,,String,"Acts as a GTPase-activating  
42 protein (GAP) for the small GTPase RHEB, / May also play a role in  
43 microtubule-mediated protein transport",  
44 ZEB1,,,,,,,,,,,,,,,,X,X,,,,,encodes a zinc finger transcription  
45 factor /Represses E-cadherin promoter and induces an epithelial-  
46 mesenchymal transition (EMT) by recruiting  
47 SMARCA4/BRG1,10.1038/onc.2010.102.  
48  
49  
50 TOPBP1,X,,,,,,,,X,,,,,,,,,Recruits the SWI/SNF chromatin  
51 remodeling complex /initiation of DNA replication and regulation of  
52 checkpoint responses./DNA  
53 repair,10.1016/j.cell.2005.12.041/10.1016/j.dnarep.2014.06.004.  
54 ZNF687,X,,X,,,,,,,,,,,,,May be involved in transcriptional  
55 regulation/ interacts with The nucleosome remodeling and deacetylase  
56 (NuRD) complex,10.1111/febs.12972

1 LMNA,,,,X,,,,,,,,,,,,,,,,,,,,,,,,,,,,,"components of the nuclear lamina /  
2 important role in nuclear assembly, chromatin organization, nuclear  
3 membrane and telomere dynamics",10.4161/19491034.2014.990855.  
4 ZC3H14,,,,X,,X,X,,,,,,,,,,,,,,,,,,,,,,,,,,,,,"Involved in poly(A) tail length  
5 control in neuronal cells/may influence mRNA stability, nuclear export,  
6 and translation. / quality control of mRNA splicing and export  
7 ",PMID: 27868086  
8 CLASRP,,,,X,,,,,,,,,,,,,,,,,,,,,,,,,,,,,alternative splicing  
9 regulator/,10.1074/jbc.M206504200  
10 SCAF4,,,,X,,,,,,,,,,,,,,,,,,,,,,,,,,,,,provide a link between transcription  
11 and pre-mRNA splicing.,10.1074/jbc.M803540200  
12 AHCYL1,,,,,,X,,,,,,,,,,,,,,,,,,,,,,,,,,,,,"Multifunctional, but regulates some  
13 receptor levels at the cell surface / involves  
14 IP3",10.1016/j.bbamcr.2014.01.031  
15 ANKRD50,,,,,,X,,,,,,,,,,,,,,,,,,,,,,,,,,,,,"retromer-mediated sorting/Involved  
16 in the endosome-to-plasma membrane trafficking and recycling of SNX27-  
17 retromer-dependent cargo proteins,",10.1242/jcs.156299.  
18 ATG2A,,,,,,X,,,,,,,,,,,,,,,,,,,,,,,,,,,,,binds to ligand-bound aryl hydrocarbon  
19 receptor and aids in the movement of this complex to the nucleus  
20 TRANSPORT,10.1016/j.bcnd.2010.01.005.  
21 CCZ1,,,,,,X,,,,,,,,,,,,,,,,,,,,,,,,,,,,,"a guanine exchange factor (GEF) for  
22 RAB7,/required for endosomal maturation and fusion at the  
23 vacuole/lysosome",10.1038/ncomms14034.  
24 DOPEY1,,,,,,X,,,,,,,,,,,,,,,,,,,,,,,,,,,,,Golgi to endosome  
25 trafficking,10.1002/glia.22698  
26 HOOK3,,,,,,X,,,,,,,,,,,,,,,,,,,,,,,,,,,,,Component of the FTS/Hook/FHIP complex  
27 (FHF complex). The FHF complex may function to promote vesicle  
28 trafficking and/or fusion via the homotypic vesicular protein sorting  
29 complex (the HOPS complex)./ an adapter protein linking the dynein  
30 motor complex to various cargos ,doi: 10.1021/acs.biochem.8b01065.  
31 KCNIP4,,,,,,X,,,,,,,,,,,,,,,,,,,,,,,,,,,,,Trafficking of potassium channels from  
32 the ER,10.1074/jbc.M306142200  
33 KPNA6,,,,,,X,,,,,,,,,,,,,,,,,,,,,,,,,,,,,involved in nuclear protein  
34 import,10.1083/jcb.201702092.  
35 NAPB,,,,,,X,,,,,,,,,,,,,,,,,,,,,,,,,,,,,SNAP beta isoform/vesicular transport  
36 between the endoplasmic reticulum and the Golgi  
37 apparatus,10.1111/cge.12648  
38 PITPNB,,,,,,X,,,,,,,,,,,,,,,,,,,,,,,,,,,,,Catalyzes the transfer of PtdIns and  
39 phosphatidylcholine between membranes. / Golgi  
40 transport,10.1016/j.devcel.2018.02.025.  
41 SNX1,,,,,,X,,,,,,,,,,,,,,,,,,,,,,,,,,,,,"retrograde transport of cargo proteins  
42 from endosomes to the trans-Golgi network/ member of the sorting nexin  
43 family/Interacts with membranes containing phosphatidylinositol 3-  
44 phosphate (PtdIns(3P)) or phosphatidylinositol 3,5-bisphosphate  
45 (PtdIns(3,5)P2)/",10.1016/j.ejcb.2015.07.002  
46 STXBP1,,,,,,X,,,,,,,,,,,,,,,,,,,,,,,,,,,,,a component of the synaptic vesicle  
47 fusion machinery / SNARE complex ,10.1523/JNEUROSCI.0007-16.2016.  
48 UHRF1BP1L,,,,,,X,,,,,,,,,,,,,,,,,,,,,,,,,,,,,Syntaxin associated,10.1111/j.1600-  
49 0854  
50 ZDHHC17,,,,,,X,,,,,,,,,,,,,,,,,,,,,,,,,,,,,"Palmitoyltransferase specific for a  
51 subset of neuronal proteins, including SNAP25,/ May be involved in the  
52 sorting or targeting of critical proteins involved in the initiating  
53 events of endocytosis at the plasma membrane ",10.1038/nn1702  
54 IPO11,,,,,,X,,,,,,,,,,,,,,,,,,,,,,,,,,,,,"Functions in nuclear protein import as  
55 nuclear transport receptor / mediate nucleocytoplasmic transport of  
56 protein and RNA /nuclear import is to protect PTEN from cytosolic  
57 degradation initiated by E3 ubiquitin ligase  
58 components,",10.1083/jcb.201612014



1 KCTD3,,,,,,,,X,,,,,,,,, Interacts with Cullin E3-ubiquitin  
2 ligases,10.1042/BCJ20170527  
3 ST7,,,,,,,,X,,,,,,,,,May act as a tumor suppressor.,  
4 BNC2,,,,,,,,X,,,,,,,,,transcription factor specific for skin  
5 keratinocytes/ cell cycle,10.1371/journal.pgen.1000744  
6 ILKAP,,,,,,,,X,,,,,,,,, protein serine/threonine phosphatase  
7 of the PP2C family./ may play a role in regulation of cell cycle  
8 progression / nucleocytoplasmic transport of ILK via nuclear  
9 pore,10.4161/cc.7.14.6241  
10 TSN,,,,,,,,X,,,,,,,,,"DNA-binding protein that specifically  
11 recognizes consensus sequences at the breakpoint junctions in  
12 chromosomal translocations, / DNA repair",10.1074/jbc.272.17.11402  
13 ALAS2,,,,,,,,,catalyzes the transfer of sialic acid  
14 from CMP-sialic acid to galactose-containing  
15 substrates,10.1093/glycob/cww098.  
16 CAPZA1,,,,,,,,,String,F-actin-capping protein /regulate  
17 actin cytoskeleton remodelling,doi: 10.1186/s13046-016-0474-0.  
18 CAPZA2,,,,,,,,,String,F-actin capping protein,  
19 COBL,,,,,,,,,reorganization of the actin cytoskeleton  
20 /Regulates neuron morphogenesis and increases branching of axons and  
21 dendrites / actin nucleator Cob1 is critical for neuronal  
22 morphogenesis,10.1016/j.devcel.2018.03.007.  
23 COL12A1,,,,,,,,,alpha chain of type XII collagen,  
24 COL6A1,,,,,,,,,alpha chain of type 6 collagen,  
25 FAM49B,,,,,,,,,repressing Rac activity and modulating  
26 cytoskeleton reorganization.,10.1073/pnas.1801340115  
27 GNL1,,,,,,,,,GTPase,  
28 GRIA1,,,,,,,,,String,Ionotropic glutamate receptor. L-  
29 glutamate acts as an excitatory neurotransmitter at many synapses in  
30 the central nervous system,  
31 GRIA4,,,,,,,,,String,Receptor for glutamate that  
32 functions as ligand-gated ion channel in the central nervous system and  
33 plays an important role in excitatory synaptic transmission,  
34 GRIK2,,,,,,,,,Ionotropic glutamate receptor. L-  
35 glutamate acts as an excitatory neurotransmitter at many synapses in  
36 the central nervous system.,  
37 HMBS,,,,,,,,,heme biosynthetic pathway,  
38 IP6K2,,,,,,,,,inositol phosphokinase (IPK)  
39 family,10.1038/ncomms5178  
40 IQGAP1,,,,,,,,,"regulating the dynamics and assembly  
41 of the actin cytoskeleton / a highly conserved cytoplasmic scaffold  
42 protein, is able to curb, compartmentalize, and coordinate multiple  
43 signaling pathways in a variety of cell  
44 types.",10.1016/j.molimm.2015.02.012.  
45 KLF6,,,,,,,,,Kruppel-like family of transcription  
46 factors,10.1038/s41598-018-31101-5.  
47 MDH1,,,,,,,,,"enzyme that catalyzes the NAD/NADH-  
48 dependent, reversible oxidation of malate to oxaloacetate",  
49 NODAL,,,,,,,,,secreted ligand of the TGF-beta,  
50 OLFM1,,,,,,,,,exact function of the encoded protein is  
51 not known /Olfm1 may regulate receptor trafficking from the  
52 intracellular compartments to the synaptic membrane microdomain/  
53 synaptosomes,10.1111/jnc.14231.  
54 PGM5,,,,,,,,,phosphotransferases involved in  
55 interconversion of glucose-1-phosphate and glucose-6-phosphate,  
56 PIP4K2B,,,,,,,,,member of the phosphatidylinositol-5-  
57 phosphate 4-kinase family / a molecular sensor that transduces changes

1 in GTP into changes in the levels of the phosphoinositide PtdIns5P  
2 ,10.1016/j.tibs.2016.04.003.  
3 PITPNA,,,,,,,,,,,,,,,,,,,,Catalyzes the transfer of PtdIns and  
4 phosphatidylcholine between membranes. / Golgi  
5 transport,10.1016/j.devcel.2018.02.025.  
6 PLXNB2,,,,,,,,,,,,,,,,,,,,transmembrane receptors that  
7 participate in axon guidance,10.1074/jbc.M206005200  
8 PLXNC1,,,,,,,,,,,,,,,,,,,,transmembrane receptors that  
9 participate in axon guidance,10.1074/jbc.M206005200  
10 PORCN,,,,,,,,,,,,,,,,,,,,membrane bound O-acyltransferase (MBOAT)  
11 that is involved in the acylation (palmitoylation) of Wnt proteins /  
12 Post-translational modification/ Vesicle transport of Wnt containing  
13 vesicle from the ER,10.1371/journal.pone.0212711.  
14 PPF1A1,,,,,,,,,,,,,,,,,,,,regulate the disassembly of focal  
15 adhesions/ important for the trafficking of Kif7 and Gli proteins to  
16 the tips of cilia/facilitates exocytosis ,10.1126/scisignal.2005608.  
17 RAD54L2,,,,,,,,,,,,,,,,,,,,DNA helicase /ARIP4 a SNF2 chromatin  
18 remodeling factor (potential),10.1091/mbc.E08-12-1247  
19 RRM2,,,,,,,,,,,,,,,,,,,,Ribonucleotide Reductase Regulatory  
20 Subunit M2 / relates to cell cycle / makes deoxy  
21 nucleotides,10.3892/or.2018.6420  
22 SESN3,,,,,,,,,,,,,,,,,,,,May function as an intracellular leucine  
23 sensor that negatively regulates the TORC1 signaling  
24 pathway,10.1016/j.cmet.2012.08.004.  
25 ST3GAL2,,,,,,,,,,,,,,,,,,,,autophagosome formation/ Atg2-Atg18  
26 complex tethers the PAS to the ER to initiate membrane expansion during  
27 autophagosome formation.,10.1073/pnas.1806727115.  
28 STMN2,,,,,,,,,,,,,,,,,,,,Regulator of microtubule stability /  
29 SCG10 induced APP accumulation in post-Golgi vesicles and on the cell  
30 surface by facilitating its secretory pathway,10.1093/hmg/ddt339.  
31 TEK,,,,,,,,,,,,,,,,,,,,receptor tyrosine kinase,  
32 THSD7A,,,,,,,,,,,,,,,,,,,,Plays a role in actin cytoskeleton  
33 rearrangement.,  
34 TMEM131,,,,,,,,,,,,,,,,,,,,Transmembrane protein / unknown  
35 function,  
36 TMEM63B,,,,,,,,,,,,,,,,,,,,Transmembrane protein / Acts as an  
37 osmosensitive calcium-permeable cation channel.,  
38 TTC17,,,,,,,,,,,,,,,,,,,,role in primary ciliogenesis by  
39 modulating actin polymerization,10.1371/journal.pone.0086476.  
40 TTC7B,,,,,,,,,,,,,,,,,,,,Component of a complex required to  
41 localize phosphatidylinositol 4-kinase (PI4K) to the plasma  
42 membrane,10.1128/MCB.01047-08.  
43  
44  
45
